# Supplementary material for: Triazole linked ruthenium(ii)–porphyrin: influence of the connectivity pattern on photophysical and electrochemical properties
Source: Royal Society of Chemistry journal article supplement (doi:10.1039/c6nj01676f), 2016-01-01
Supplement: c6nj01676f1.pdf [file c6nj01676f1.pdf]

## New Journal of Chemistry

### Triazole linked ruthenium(II) porphyrin: influence of connectivity pattern on photophysical and electrochemical properties

Smriti Arora, Ritika Nagpal, Prashant Chauhan, Shive Murat Singh Chauhan\*

*Bioorganic Laboratory, Department of Chemistry,  
University of Delhi, Delhi-110 007, India.*

[smschauhan@chemistry.du.ac.in](mailto:smschauhan@chemistry.du.ac.in)

### Supporting Information

#### Materials Used

Pyrrole was distilled prior to use. All other reagents (Propionic acid- Spectrochem, 2-ethynyl pyridine - Alfa Aesar, 2-bromo pyridine – Spectrochem, LiCl – Spectrochem,  $\text{RuCl}_3 \cdot x\text{H}_2\text{O}$  – Alfa Aesar, Solvents – Analytical grade) were of analytical grade and used without further purification.  $\text{cis-Ru}(\text{bpy})_2\text{Cl}_2$  was synthesized according to literature procedure.<sup>1</sup> Solvents for the electrochemical measurements were distilled from calcium hydride under argon. The compounds were purified using silica gel (60-120 mesh), neutral alumina chromatography.

#### Experimental

##### Synthesis

##### *5-(4-ethynylphenyl)-10,15,20-tris(3,5-di-tert-butylphenyl)porphyrin (1)*

To a solution of pyrrole (0.8 ml, 12.1 mmol) in  $\text{CHCl}_3$  (1.2 L), 3,5-di-*tert*-butylbenzaldehyde (2 g, 9.17 mmol), 4-[(trimethylsilyl)ethynyl]benzaldehyde (0.617 g, 3.04 mmol) and  $\text{BF}_3\text{OEt}_2$  (1.19 ml) were added. After stirring the reaction mixture for 1 h at rt, DDQ (2.07 g, 9.11 mmol) was added and the mixture again stirred for 1 h. In order to neutralize the acid catalyst,  $\text{Et}_3\text{N}$  (0.5 ml) was added and the solution stirred for 10 min. The solvent was evaporated and residue was chromatographed on silica gel with 1:9 ratio chloroform/petroleum ether mixture as eluent. The second band was collected in 17% yield. The compound (528 mg, 0.516 mmol) was then

dissolved in MeOH–CH<sub>2</sub>Cl<sub>2</sub> (20 ml) solution and K<sub>2</sub>CO<sub>3</sub> (91 mg, 1.63 mmol) was added. After stirring at rt for 2 h, the solution was quenched with H<sub>2</sub>O, the organic phase was washed with CHCl<sub>3</sub> and brine, dried with Na<sub>2</sub>SO<sub>4</sub> anhydrous, and the solvent was removed in vacuum affording the deprotected porphyrin derivative (311 mg, 62%) as a pure red solid.

**R<sub>f</sub>** : 0.6 (1:9 CHCl<sub>3</sub>/Petroleum Ether); **UV–visible (CHCl<sub>3</sub>)**, λ<sub>abs</sub>/nm (log ε): 422 (5.18), 517 (3.80), 554 (3.55), 592 (3.25), 648 (3.02); **<sup>1</sup>H NMR (400 MHz, Chloroform-*d*) δ ppm**: 8.90 (m, 6H, βH), 8.80 (d, *J*=4.56 Hz, 2H, βH), 8.18 (d, *J*=8 Hz, 2H, ArH), 8.08 (m, 6H, ArH), 7.87 (d, *J*=8 Hz, 2H, ArH), 7.79 (m, 3H), 3.31 (s, 1H), 1.51 (s, 54H, *t*-butyl), -2.59 (br.s., 2H, -NH); **<sup>13</sup>C NMR (100 MHz, Chloroform-*d*) δ ppm**: 148.8, 148.1, 146.5, 146.5, 139.4, 134.5, 129.9, 129.8, 121.1, 114.2, 83.8, 78.2, 31.8, 29.9; **ESI-MS**: calculated 974.6226 (C<sub>70</sub>H<sub>78</sub>N<sub>4</sub>), observed 975.6260 (M+H)<sup>+</sup>.

#### ***5-(4-acetamidophenyl)-10,15,20-tris(3,5-di-*tert*-butylphenyl)porphyrin (4)***

3,5-di-*tert*-butylbenzaldehyde (2.99 g, 13.6 mmoles) and 4-acetamidobenzaldehyde (0.74 g, 4.5 mmoles) in propionic acid (240 ml) were refluxed with freshly distilled pyrrole (1.25 ml, 18 mmoles) for 2 h. The reaction mixture was cooled to room temperature, poured in ice cold water and left overnight. The black residue so formed was filtered and chromatographed on silica gel with 8:2 ratio chloroform/petroleum ether mixture as eluent. The second band was collected in 17% yield (0.771 g).

**R<sub>f</sub>** : 0.3 (CHCl<sub>3</sub>); **UV–visible (CHCl<sub>3</sub>)**, λ<sub>abs</sub>/nm (log ε): 422 (5.02), 518 (4.66), 554 (4.65), 591 (4.61), 648 (4.61); **<sup>1</sup>H NMR (400 MHz, Chloroform-*d*) δ ppm**: 8.91 (s, 4H, βH), 8.89 (d, *J*=4.56 Hz, 2H, βH), 8.85 (d, *J*=5.04 Hz, 2H, βH), 8.13 (d, *J*=8.28 Hz, 2H, ArH), 8.09 (m, 6H, ArH), 7.80 (m, 5 H, ArH), 7.52 (br.s., 1H, -NH), 2.28 (s, 3H, -CH<sub>3</sub>), 1.53 (s, 54H, *t*-butyl), -2.76 (br.s., 2H, -NH); **<sup>13</sup>C NMR (100 MHz, Chloroform-*d*) δ ppm**: 168.6, 148.7, 141.3, 138.2, 137.4, 134.9, 129.9, 129.7, 123.6, 123.4, 121.5, 121.0, 117.9, 35.1, 31.8, 31.3, 29.8; **ESI-MS**: calculated 1007.6441 (C<sub>70</sub>H<sub>81</sub>N<sub>5</sub>O), observed 1008.6519 (M+H)<sup>+</sup>, 504.8278 (M+2H)<sup>2+</sup>.

### ***5-(4-aminophenyl)-10,15,20-tris(3,5-di-tert-butylphenyl)porphyrin (5)***

Porphyrin **(1)** (0.234 g, 0.232 mmoles) in a mixture of dry EtOH (120 mL) and conc. HCl (80 mL) was vigorously stirred in a preheated oil bath at 80 °C for 24 h under N<sub>2</sub>. After completion of reaction, the solution was cooled to room temperature and then neutralized with 5% aq. NaOH solution to pH 8-9. The mixture was extracted with CHCl<sub>3</sub> (2×100 ml). The residue was dissolved in a minimum amount of CHCl<sub>3</sub> and chromatographed on silica gel with 1:1 ratio chloroform/petroleum ether mixture as eluent. The compound was collected in 92 % yield (0.206 g).

**R<sub>f</sub>**: 0.7 (CHCl<sub>3</sub>); **UV-visible (CHCl<sub>3</sub>)**, λ<sub>abs</sub>/nm (log ε): 422 (5.27), 518 (4.78), 556 (4.76), 592 (4.74), 649 (4.74); **<sup>1</sup>H NMR (400 MHz, Chloroform-*d*) δ ppm**: 8.85 (d, *J*=4.6 Hz, 2H, βH), 8.80 (m, 6H, βH), 8.01 (m, 6H, ArH), 7.93 (d, *J*=7.8 Hz, 2H, ArH), 7.71 (m, 3H, ArH), 6.97 (d, *J*=7.8 Hz, 2H, ArH), 1.44 (s, 54H, *t*-butyl), -2.76 (br.s., 2H, -NH); **<sup>13</sup>C NMR (100 MHz, Chloroform-*d*) δ ppm**: 148.7, 141.4, 137.2, 135.6, 129.8, 129.7, 126.8, 121.0, 120.9, 113.5, 110.1, 35.1, 31.8; **ESI-MS**: calculated 965.6335 (C<sub>67</sub>H<sub>77</sub>N<sub>5</sub>), observed 966.6408 (M+H)<sup>+</sup>.

### ***5-(4-azidophenyl)-10,15,20-tris(3,5-di-tert-butylphenyl)porphyrin (6)***

Porphyrin **2** (0.206 g, 0.21 mmoles) was dissolved in TFA (3.36 ml) and cooled to 0 °C in ice bath. Sodium nitrite (29.44 mg, 0.48 mmoles) was dissolved in 1 ml of water and added to the mixture, which was then stirred for 30 min at 0 °C. Sodium azide (36.71 mg, 0.64 mmoles) was dissolved in 1 ml of water and added to the reaction mixture. After the reaction was stirred in ice for 1 h, cold water was added to the flask. The crude mixture was extracted with CH<sub>2</sub>Cl<sub>2</sub> and the organic layer was washed with water until it turned purple. The organic phase was dried over Na<sub>2</sub>SO<sub>4</sub>, filtered and dried. The residue was chromatographed on silica gel using with 3:7 ratio chloroform/petroleum ether as eluent, and the desired product was obtained after evaporation in 92 % yield (0.194 g).

**R<sub>f</sub>**: 0.6 (60% Pet. Ether : CHCl<sub>3</sub>); **UV-visible (CHCl<sub>3</sub>)**, λ<sub>abs</sub>/nm (log ε): 422 (5.37), 518 (4.61), 554 (4.43), 592 (4.20), 647 (4.11); **<sup>1</sup>H NMR (400 MHz, Chloroform-*d*) δ ppm**: 8.82-8.75 (m, 8H, βH), 8.14 (d, *J*=7.48 Hz, 2H, ArH), 8.00 (m, 6H, ArH), 7.72 (m, 3H, ArH), 7.45 (d, *J*=7.6Hz, 2H, ArH), 1.45 (s, 54H, *t*-butyl), -2.78 (br.s., 2H, -NH); **<sup>13</sup>C NMR (100 MHz, Chloroform-*d*) δ ppm**: 148.7, 141.1, 138.1, 135.8, 129.8, 129.5, 126.8, 121.6, 120.5, 113.6,

109.6., 35.2, 31.7; **ESI-MS**: calculated: 991.6240 (C<sub>68</sub>H<sub>77</sub>N<sub>7</sub>), observed 992.6313 (M+H)<sup>+</sup>; **FT IR (cm<sup>-1</sup>)**: 2120 (azide).

### Characterization of synthesized compounds

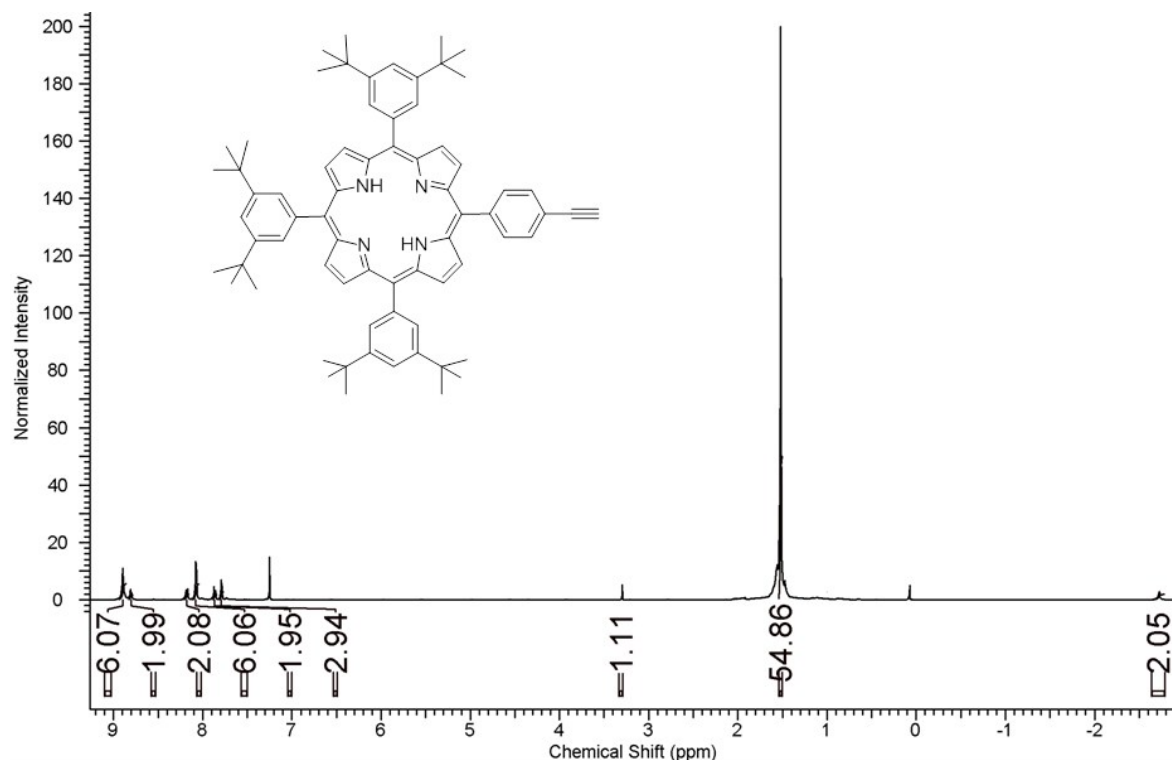

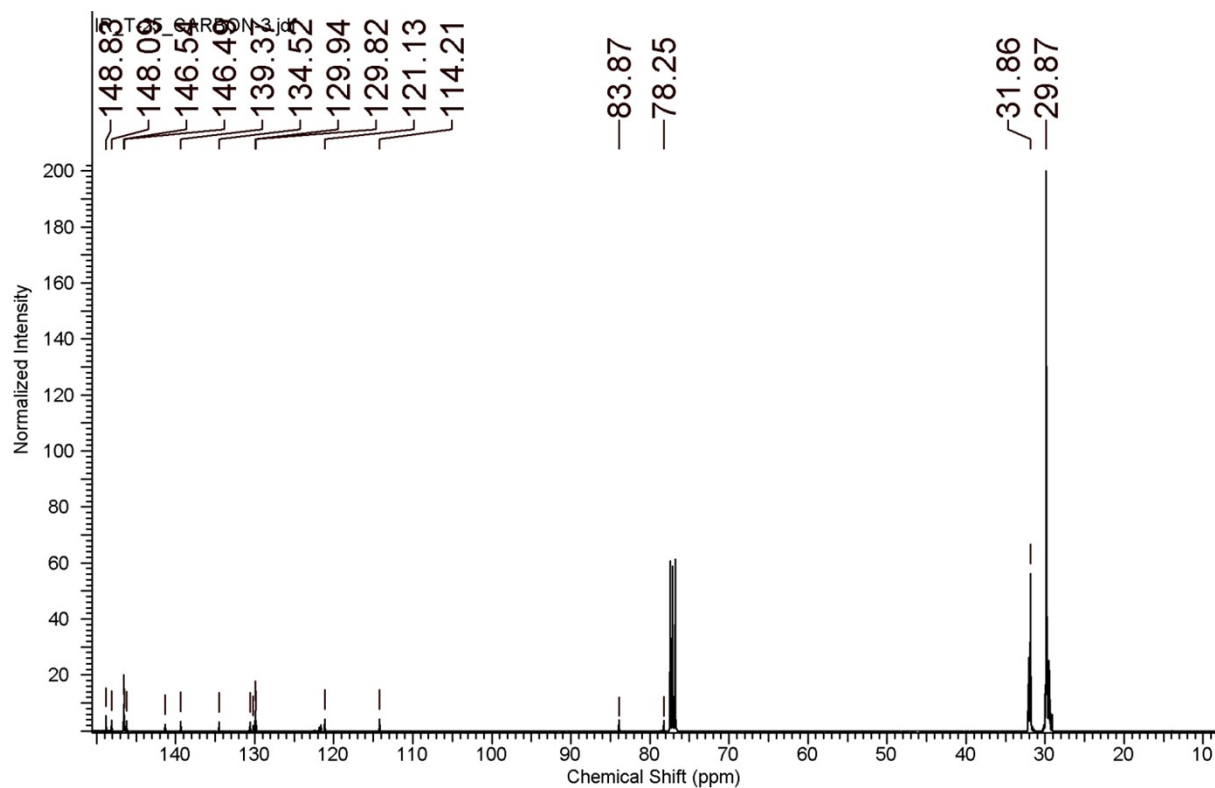

**Figure S1:  $^1\text{H}$  NMR and  $^{13}\text{C}$  NMR spectrum of 5-(4-ethynylphenyl)-10,15,20-tris(3,5-di-tert-butylphenyl)porphyrin (1) in Chloroform- $d$ .**

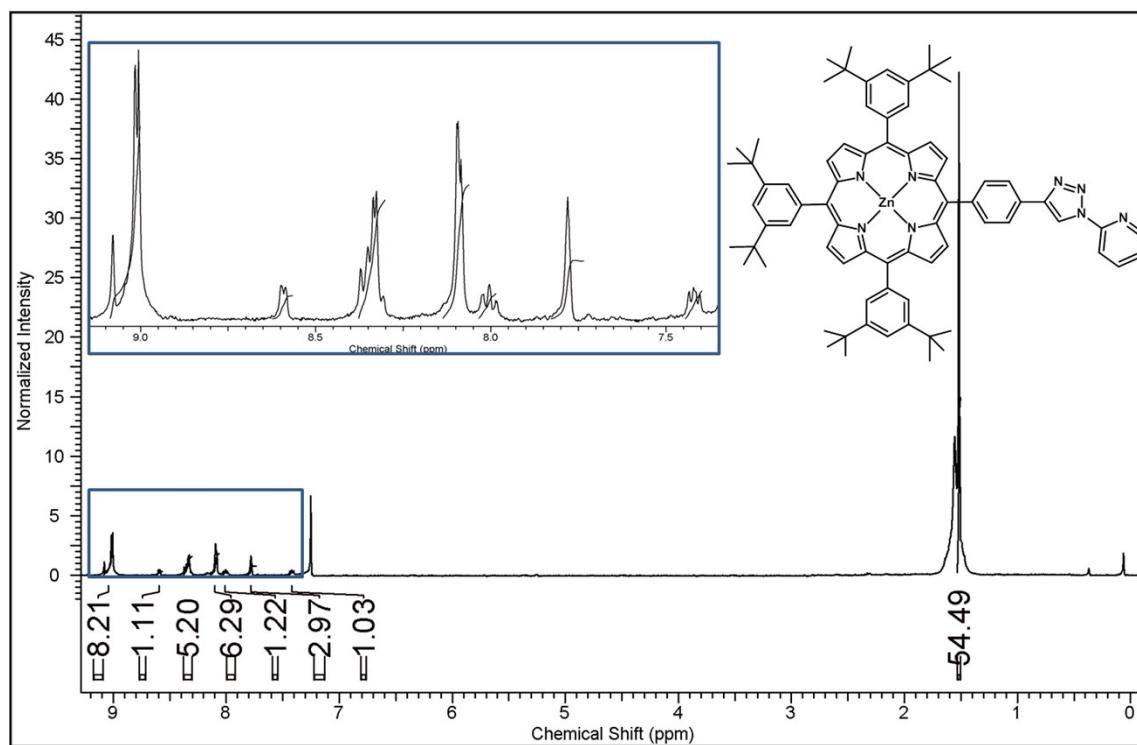

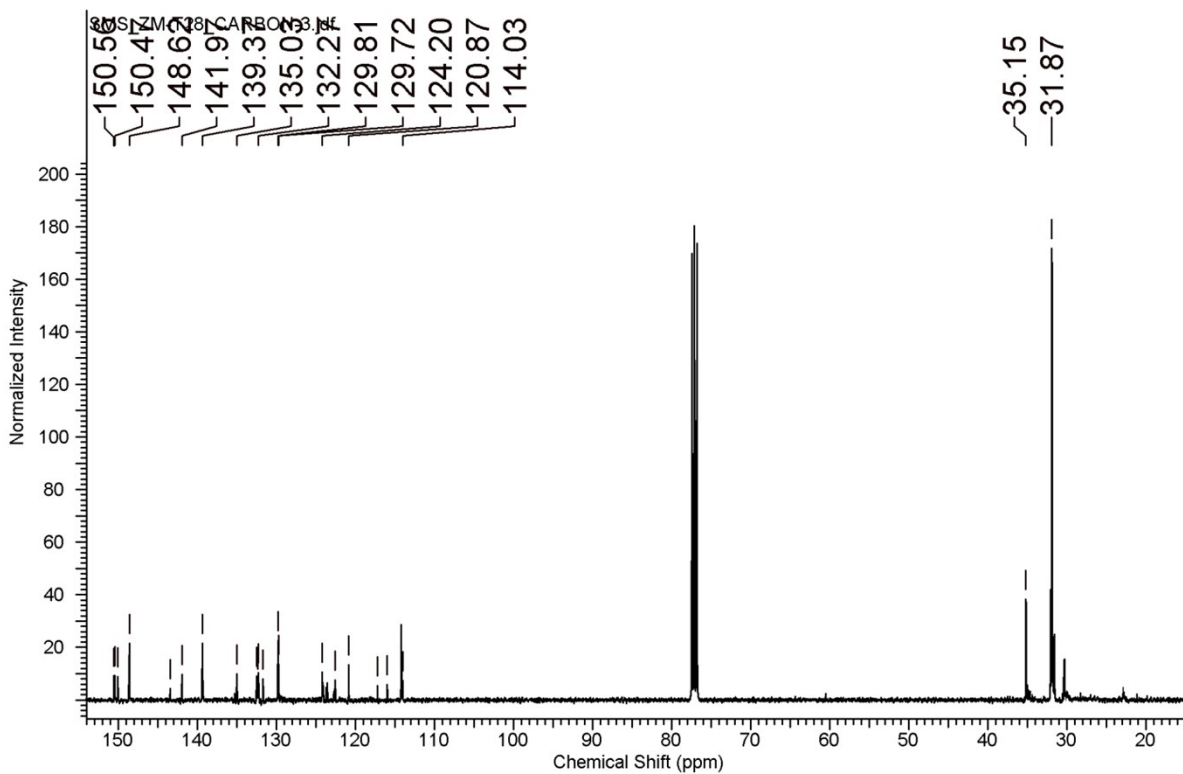

**Figure S2:**  $^1\text{H}$  and  $^{13}\text{C}$  NMR spectrum of 2-[5-(4-phenyl)-10,15,20-tris(3,5-di-tert-butylphenyl)porphyrinato zinc]-4-(1'-pyridyl)-1,2,3-triazole (2-Zn) in Chloroform-*d*.

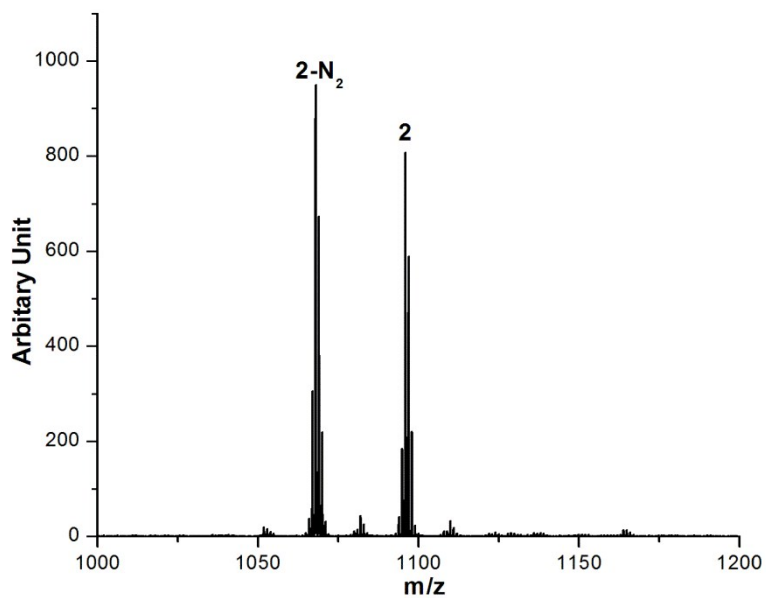

**Figure S3:** MALDI of 2-[5-(4-phenyl)-10,15,20-tris(3,5-di-tert-butylphenyl)porphyrinato zinc]-4-(1'-pyridyl)-1,2,3-triazole (2-Zn)

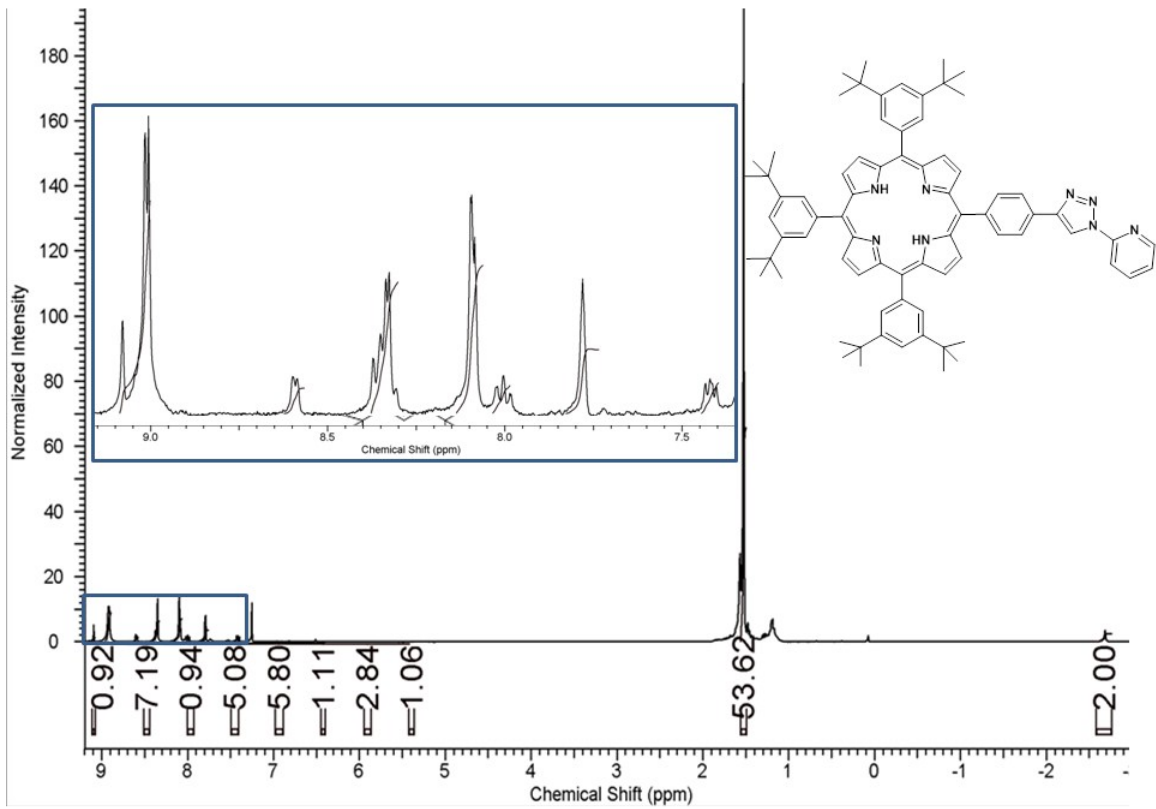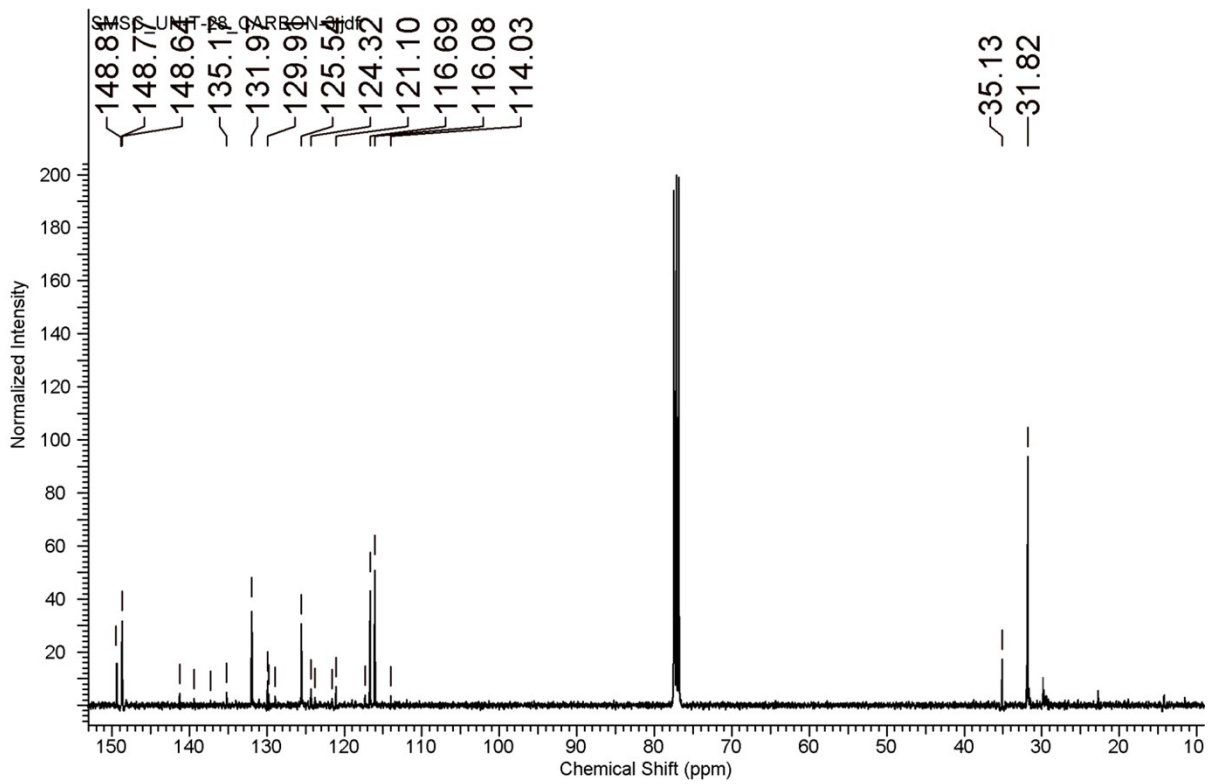

**Figure S4:**  $^1\text{H}$  NMR and  $^{13}\text{C}$  NMR spectrum of 2-[5-(4-phenyl)-10,15,20-tris(3,5-di-tert-butylphenyl)porphyrin]-4-(1'-pyridyl)-1,2,3-triazole (2) in Chloroform-*d*.

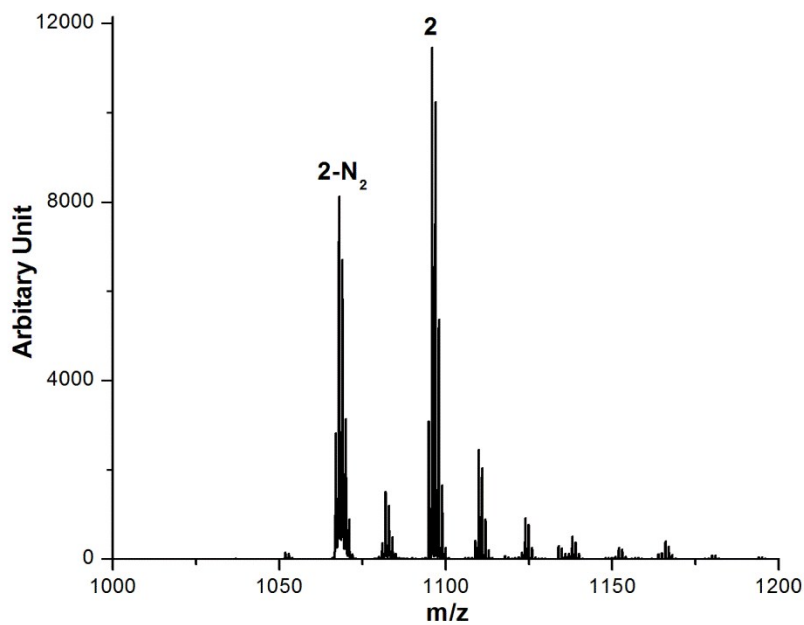

**Figure S5:** MALDI of 2-[5-(4-phenyl)-10,15,20-tris(3,5-di-tert-butylphenyl)porphyrin]-4-(1'-pyridyl)-1,2,3-triazole (2).



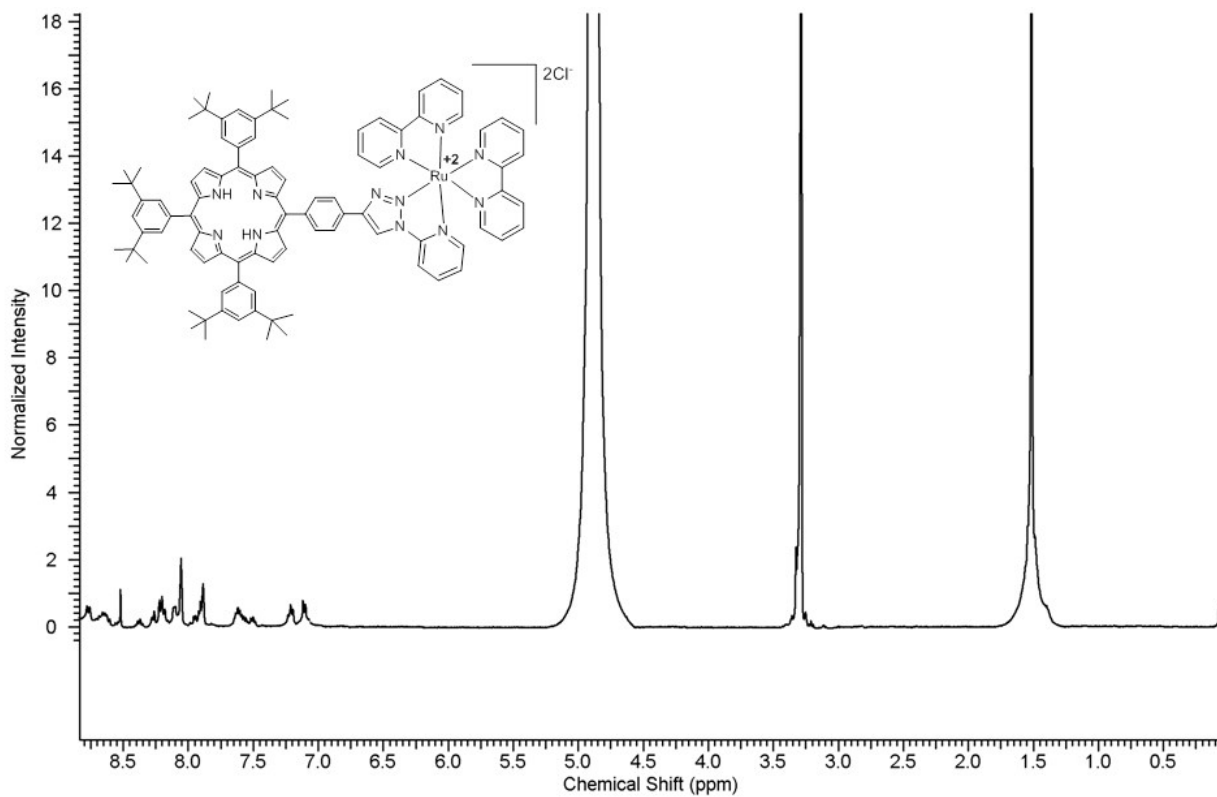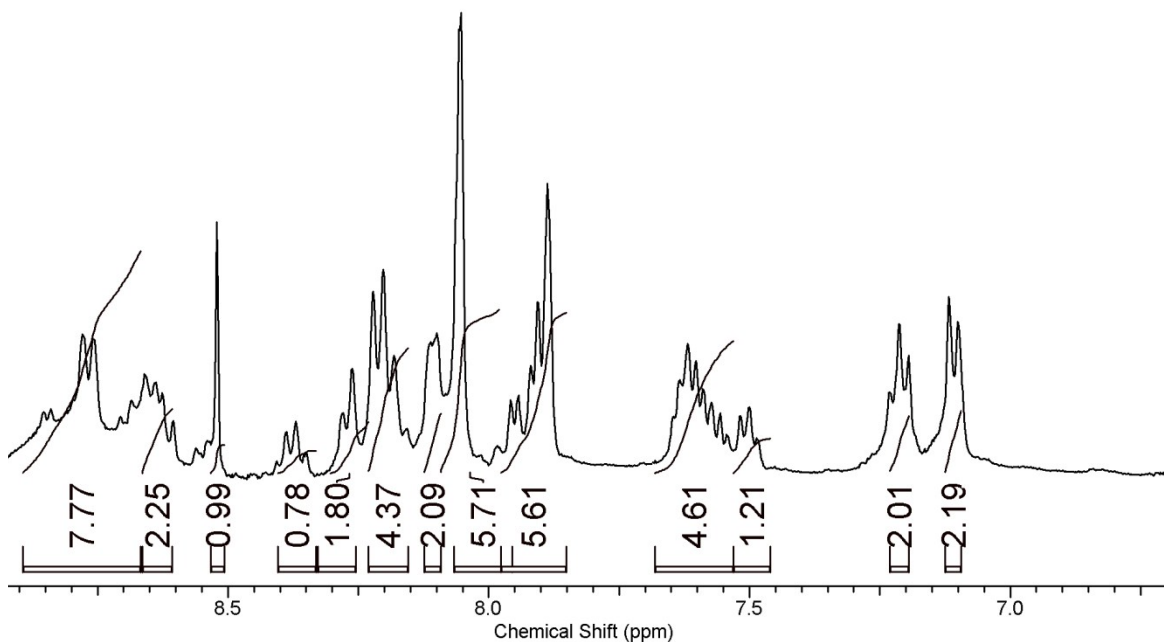

**Figure S6:**  $^1\text{H}$  NMR spectrum of 2-[5-(4-phenyl)-10,15,20-tris(3,5-di-*tert*-butylphenyl)porphyrinyl]-1*H*-1,2,3-triazol-1-yl-pyridine-2'-bispyridine ruthenium (II) chloride (3) in Methanol- $d$ .

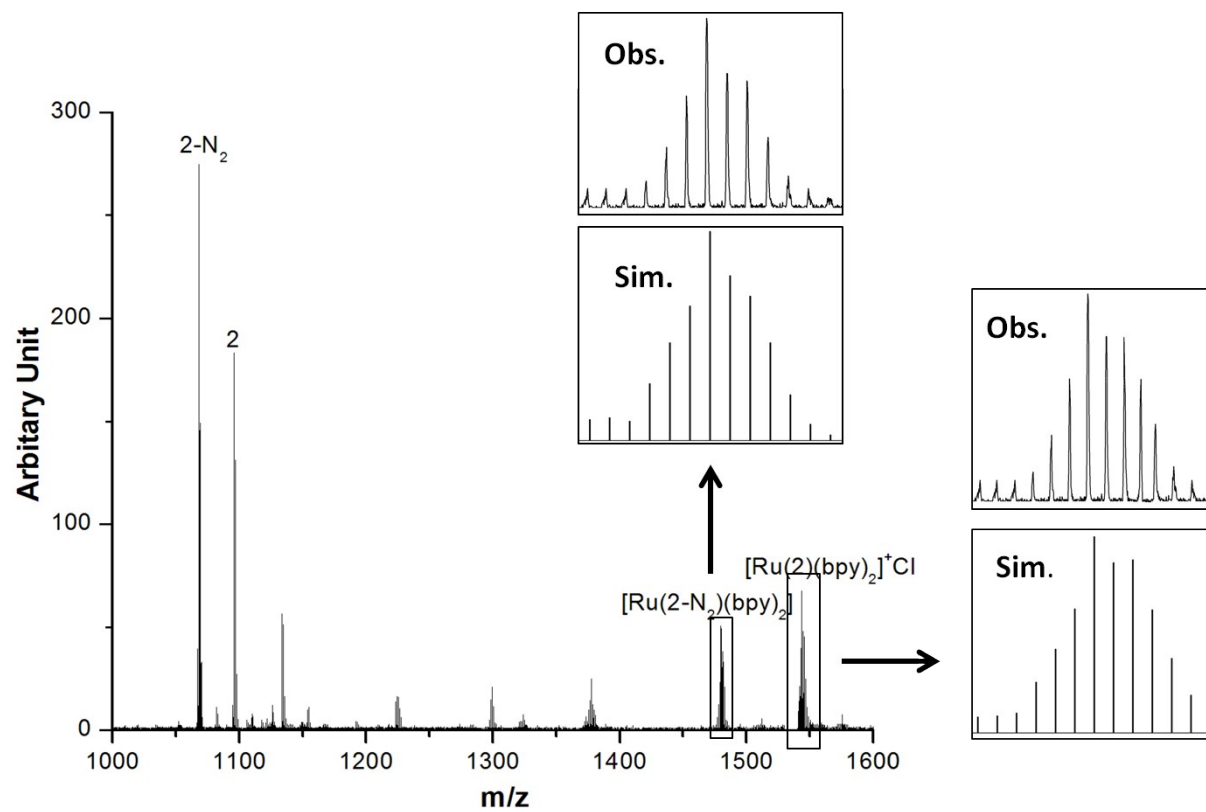

**Figure S7: MALDI of 2-[5-(4-phenyl)-10,15,20-tris(3,5-di-tert-butylphenyl)porphyrinyl]-1H-1,2,3-triazol-1-yl-pyridine-2,2'-bispyridine ruthenium (II) chloride (3)**

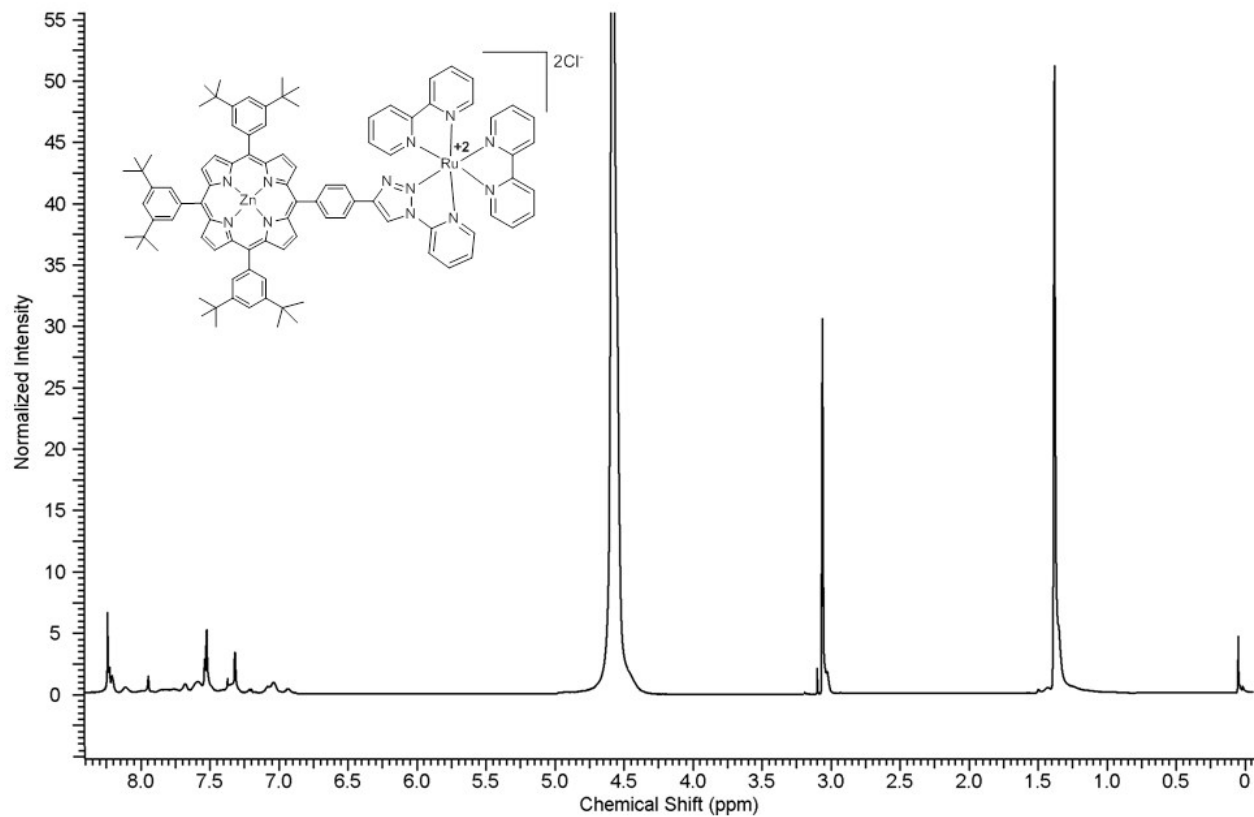

**Figure S8:**  $^1\text{H}$  NMR spectrum of 2-[5-(4-phenyl)-10,15,20-tris(3,5-di-tert-butylphenyl)porphyrinato zinc]-1H-1,2,3-triazol-1-yl-pyridine-2,2'-bispyridine ruthenium (II) chloride (3-Zn) in Methanol- $d$ .

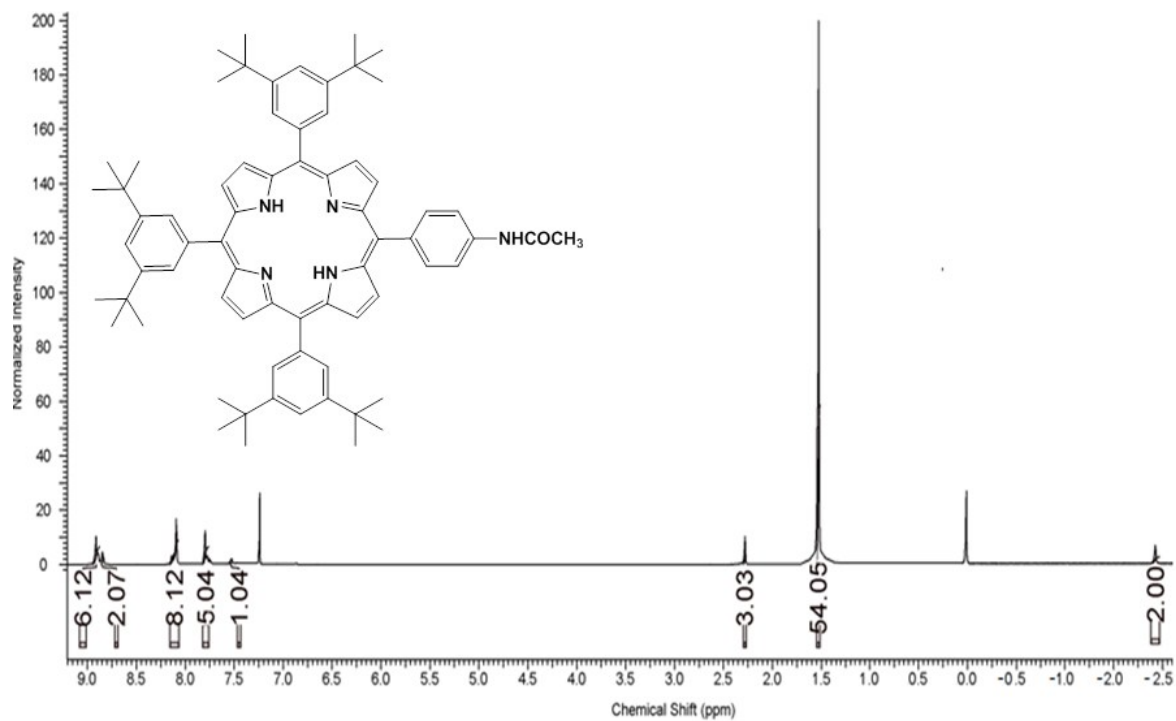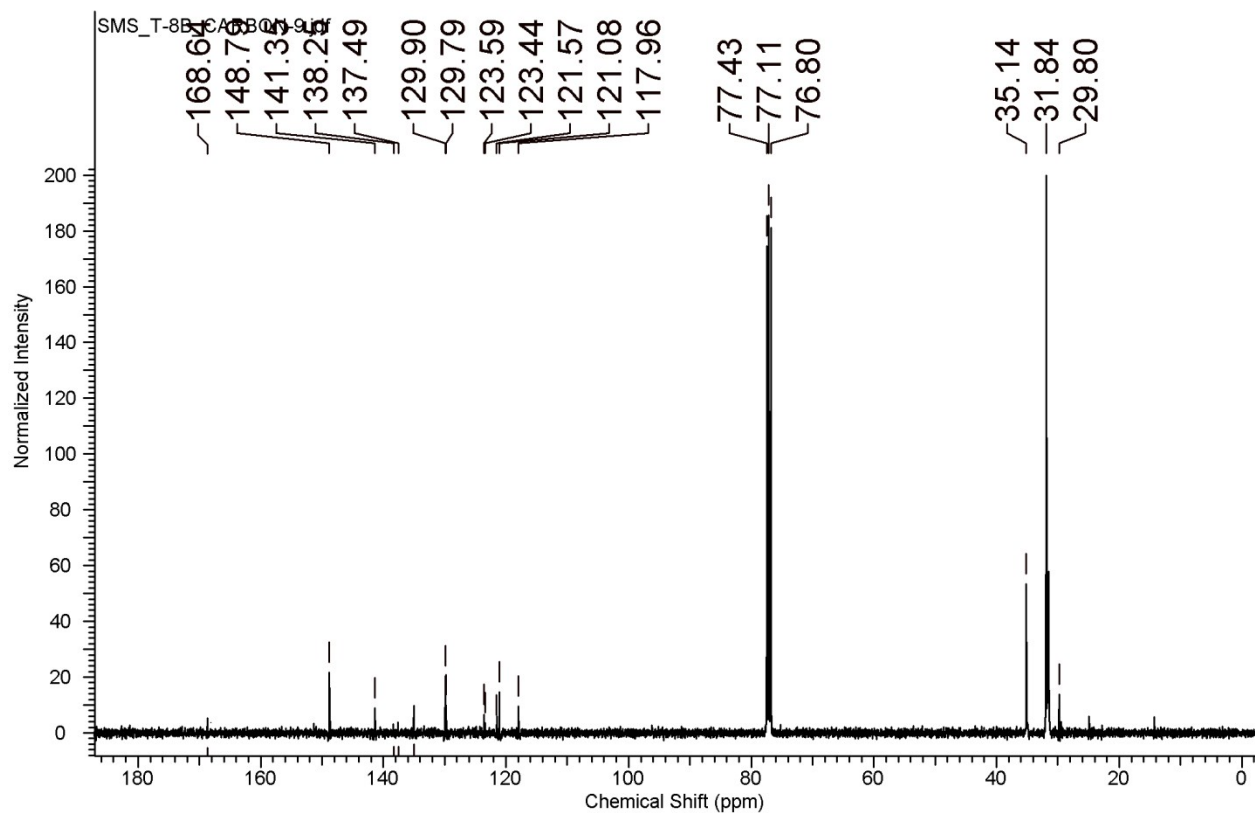

**Figure S9:**  $^1\text{H}$  NMR and  $^{13}\text{C}$  NMR spectrum of 5-(4-acetamidophenyl)-10,15,20-tris(3,5-di-*tert*-butylphenyl)porphyrin (4) in Chloroform- $d$ .

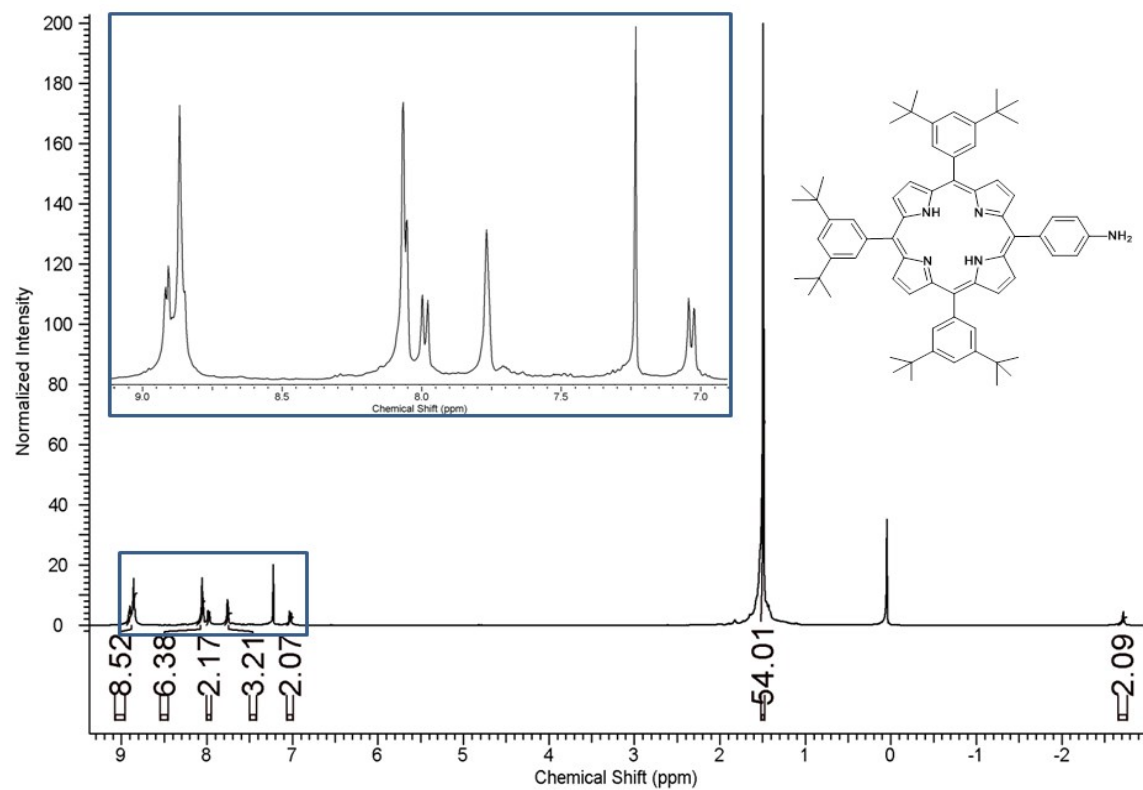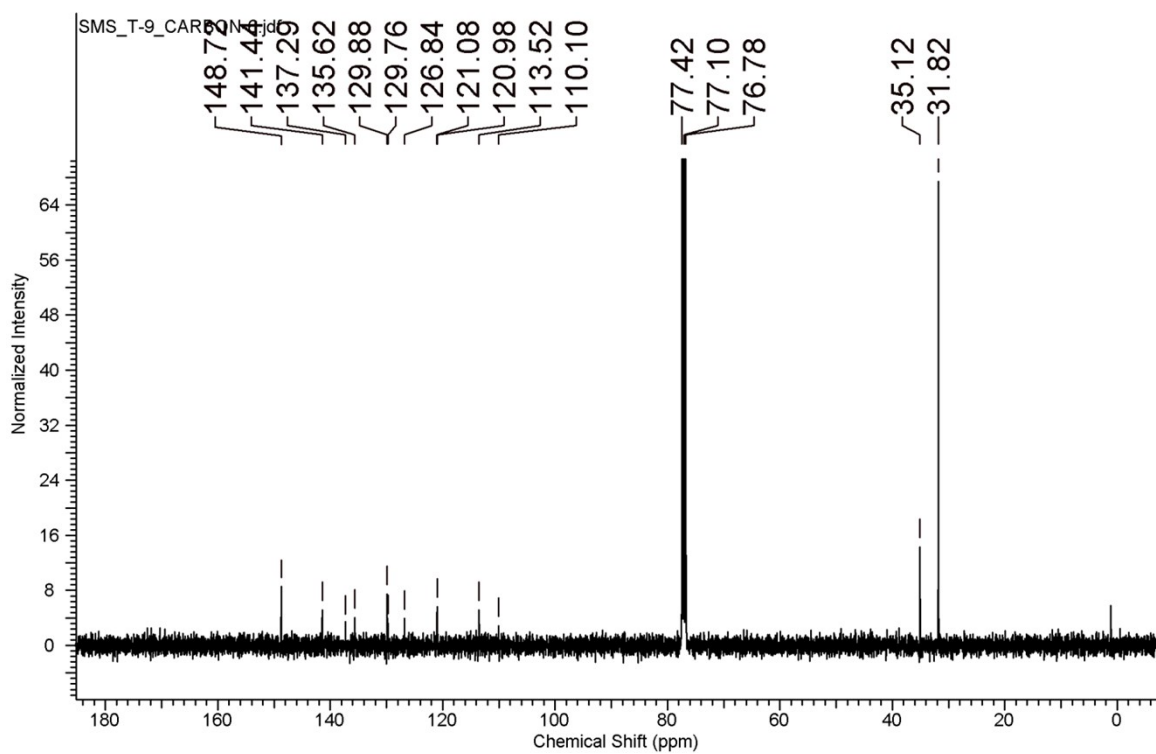

**Figure S10: <sup>1</sup>H NMR and <sup>13</sup>C NMR spectrum of 5-(4-aminophenyl)-10,15,20-tris(3,5-di-tert-butylphenyl)porphyrin (5) in Chloroform-*d*.**

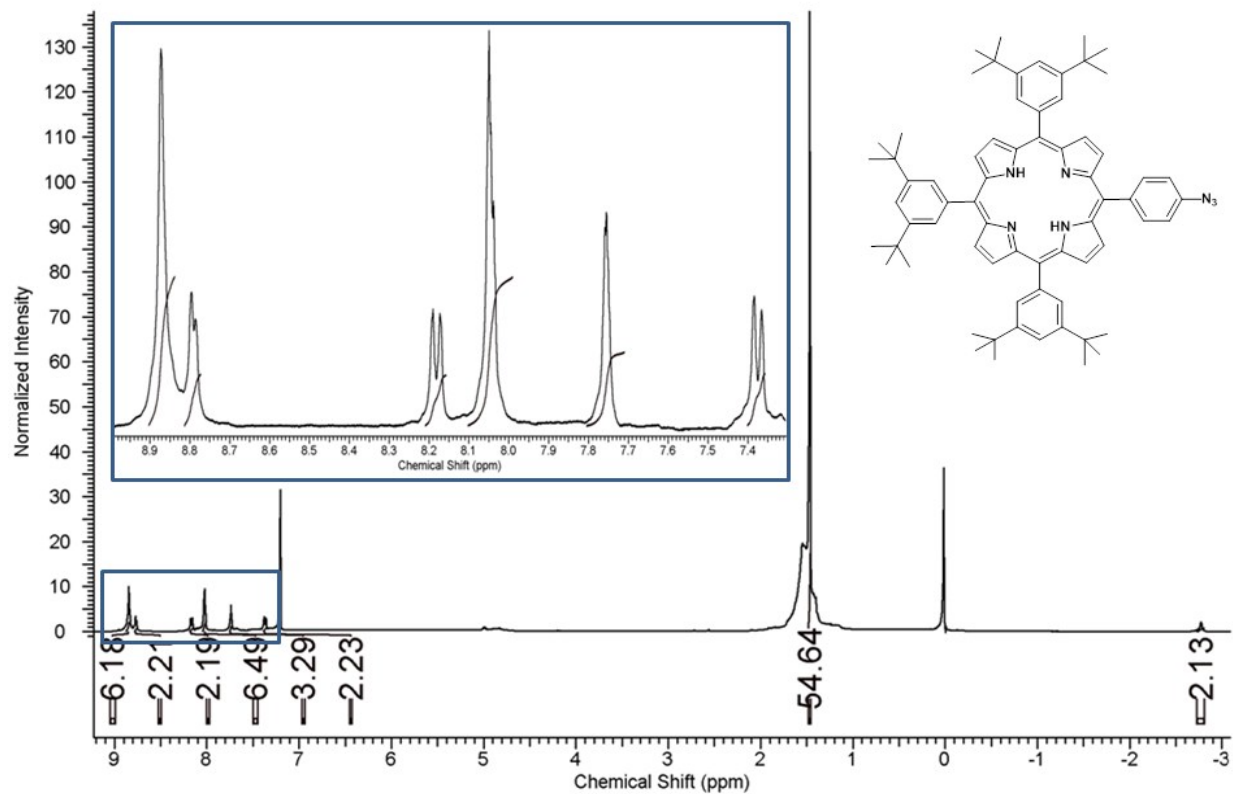

**Figure S11:** <sup>1</sup>H NMR spectrum of 5-(4-azidophenyl)-10,15,20-tris(3,5-di-*tert*-butylphenyl)porphyrin (**6**) in Chloroform-*d*.

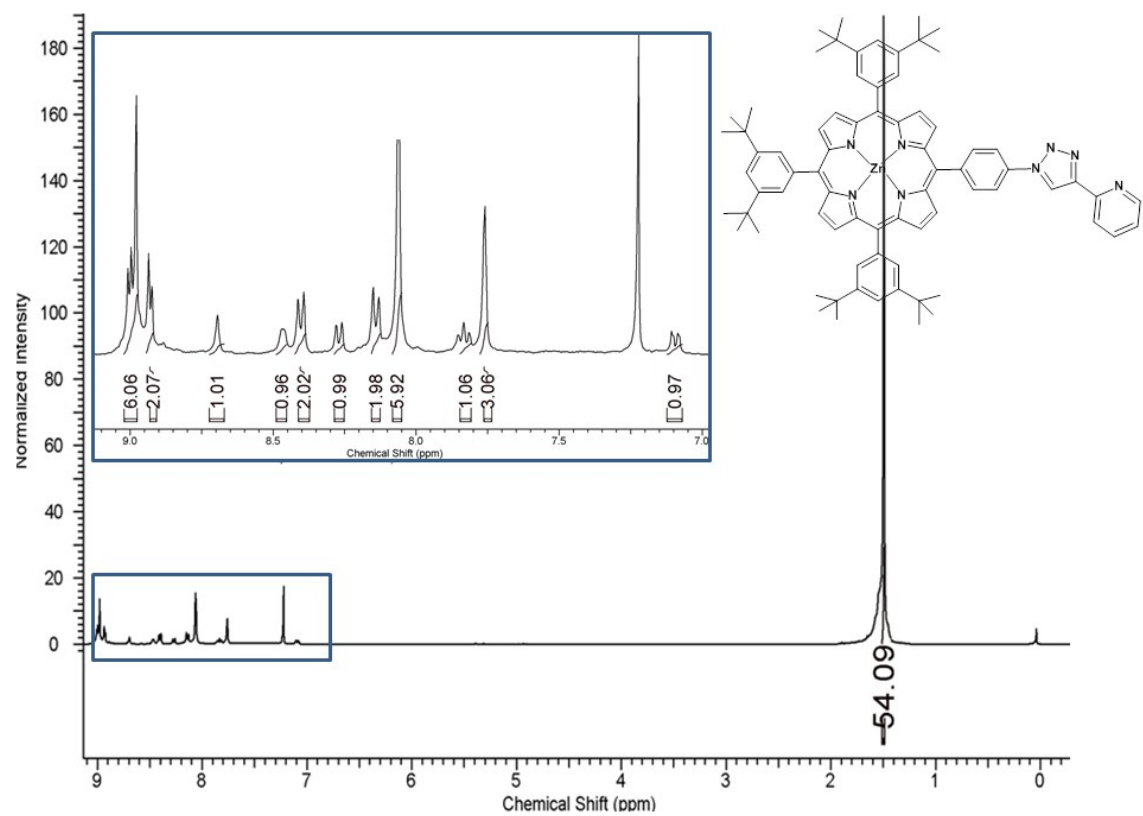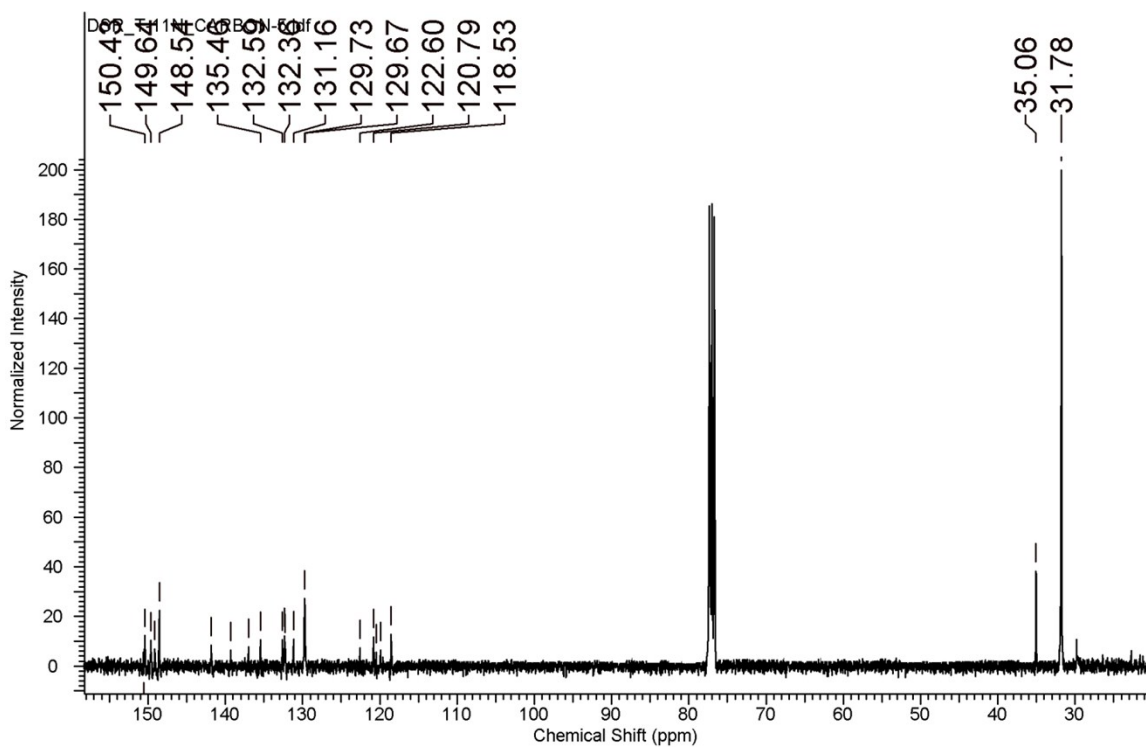

Figure S12: <sup>1</sup>H NMR spectrum of 2-[5-(1-phenyl)-10,15,20-tris(3,5-di-tert-butylphenyl)porphyrinato zinc]-1,2,3-triazol-4-yl pyridine (7-Zn) in Chloroform-d.

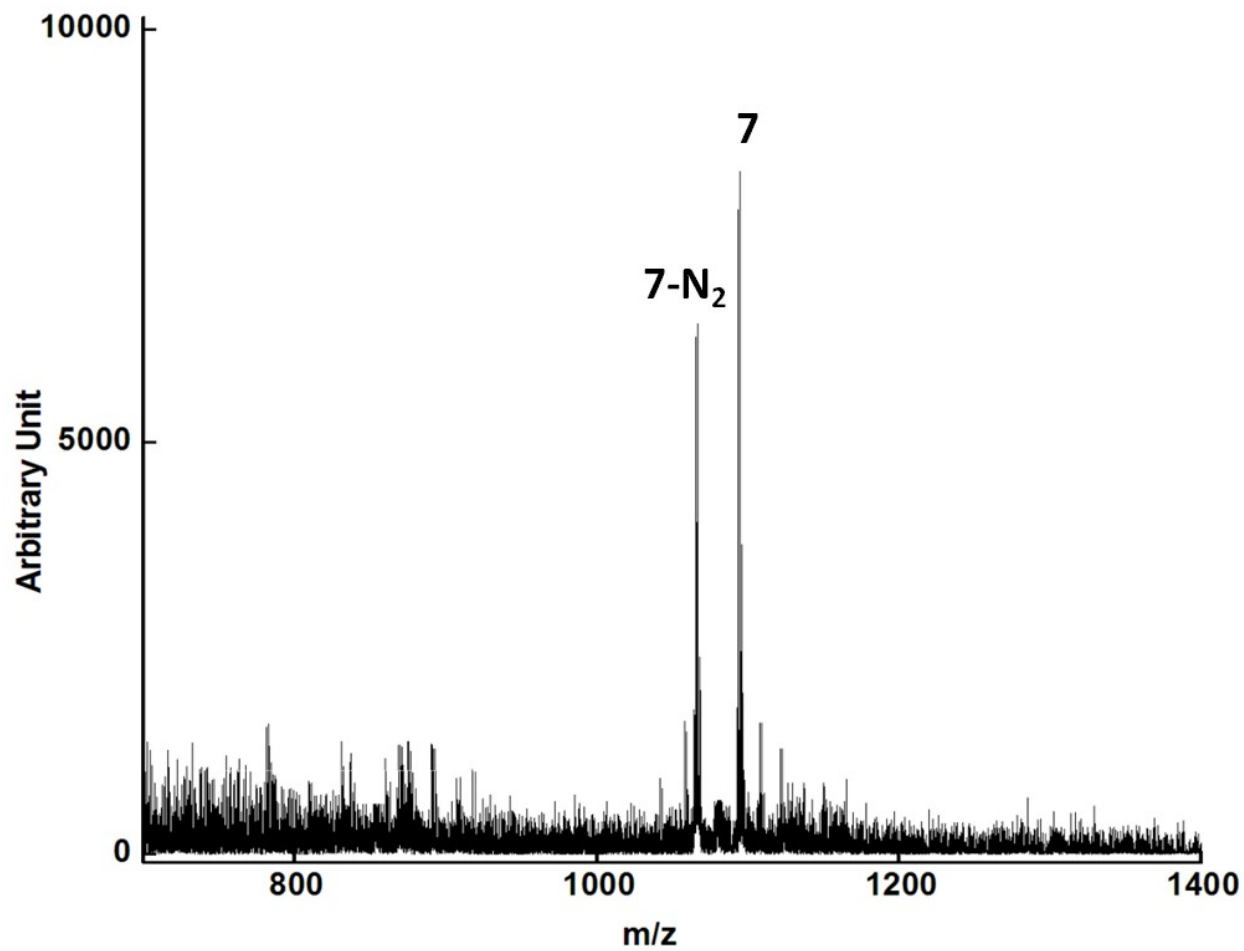

**Figure S13:** MALDI TOF spectrum of 2-[5-(1-phenyl)-10,15,20-tris(3,5-di-*tert*-butylphenyl)porphyrinato zinc]-1,2,3-triazol-4-yl pyridine (7-Zn)



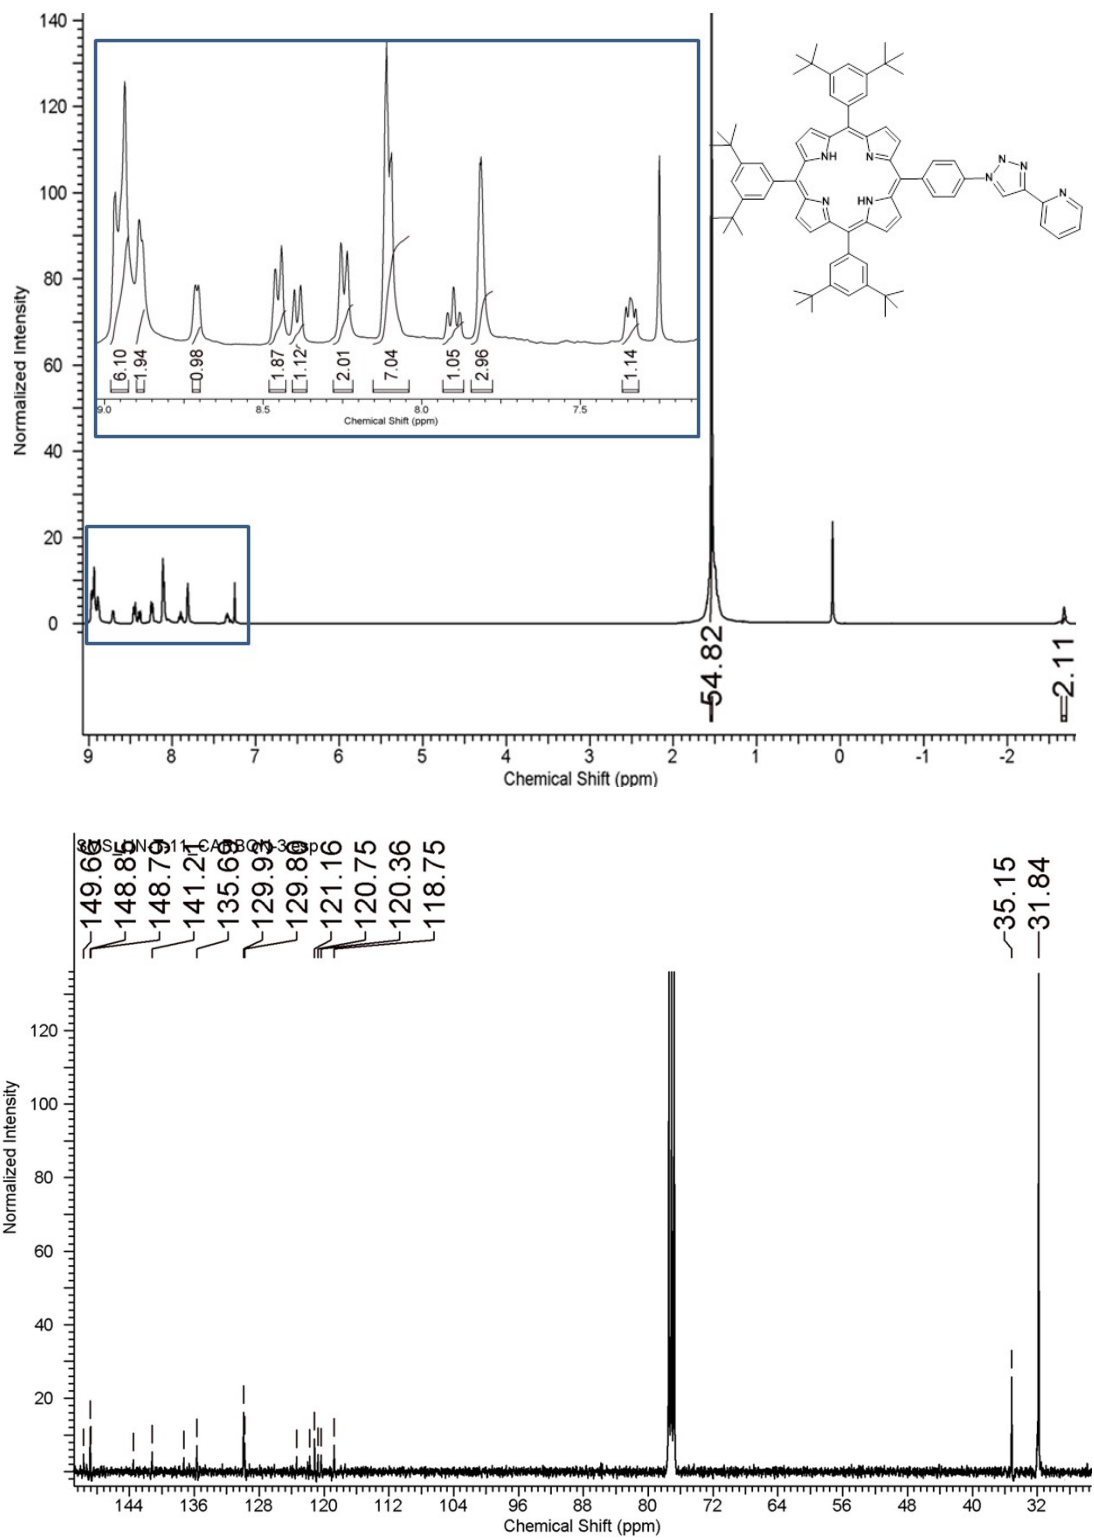

**Figure S14:** <sup>1</sup>H NMR and <sup>13</sup>C NMR spectrum of 2-[5-(1-phenyl)-10,15,20-tris(3,5-di-tert-butyl)phenylporphyrinato zinc]-1,2,3-triazol-4-yl pyridine (7) in Chloroform-d.

MFE MS Spectrum

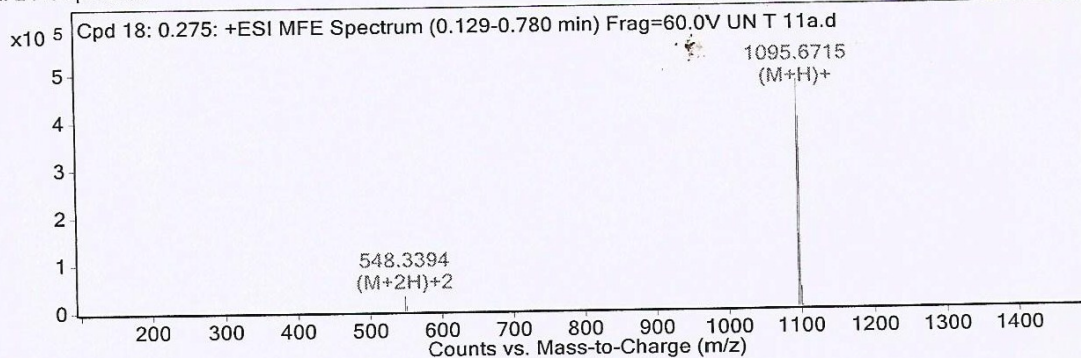

MFE MS Zoomed Spectrum

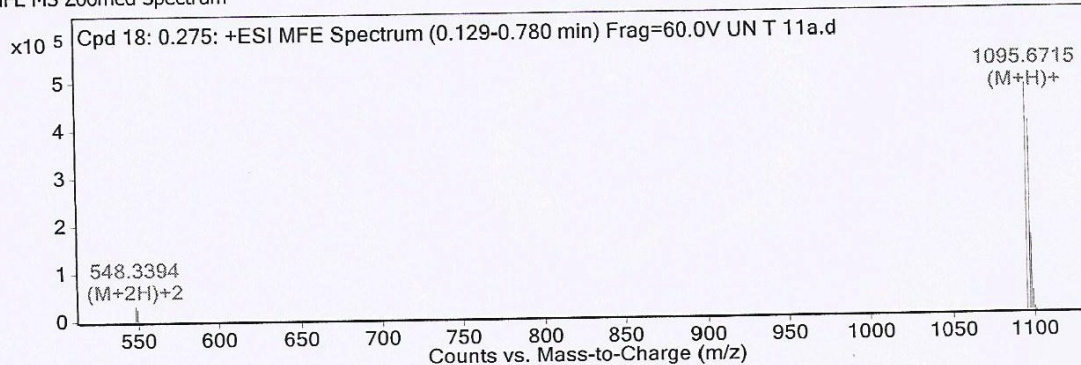

MS Spectrum Peak List

| <i>m/z</i> | <i>z</i> | Abund     | Ion      |
|------------|----------|-----------|----------|
| 548.3394   | 2        | 32653.92  | (M+2H)+2 |
| 548.8401   | 2        | 26233.76  | (M+2H)+2 |
| 549.3423   | 2        | 11628.45  | (M+2H)+2 |
| 549.8445   | 2        | 2898      | (M+2H)+2 |
| 1095.6715  | 1        | 477672.56 | (M+H)+   |

Figure S15: ESI-MS spectrum of 2-[5-(1-phenyl)-10,15,20-tris(3,5-di-*tert*-butyl)phenylporphyrinato zinc]-1,2,3-triazol-4-yl pyridine (7)

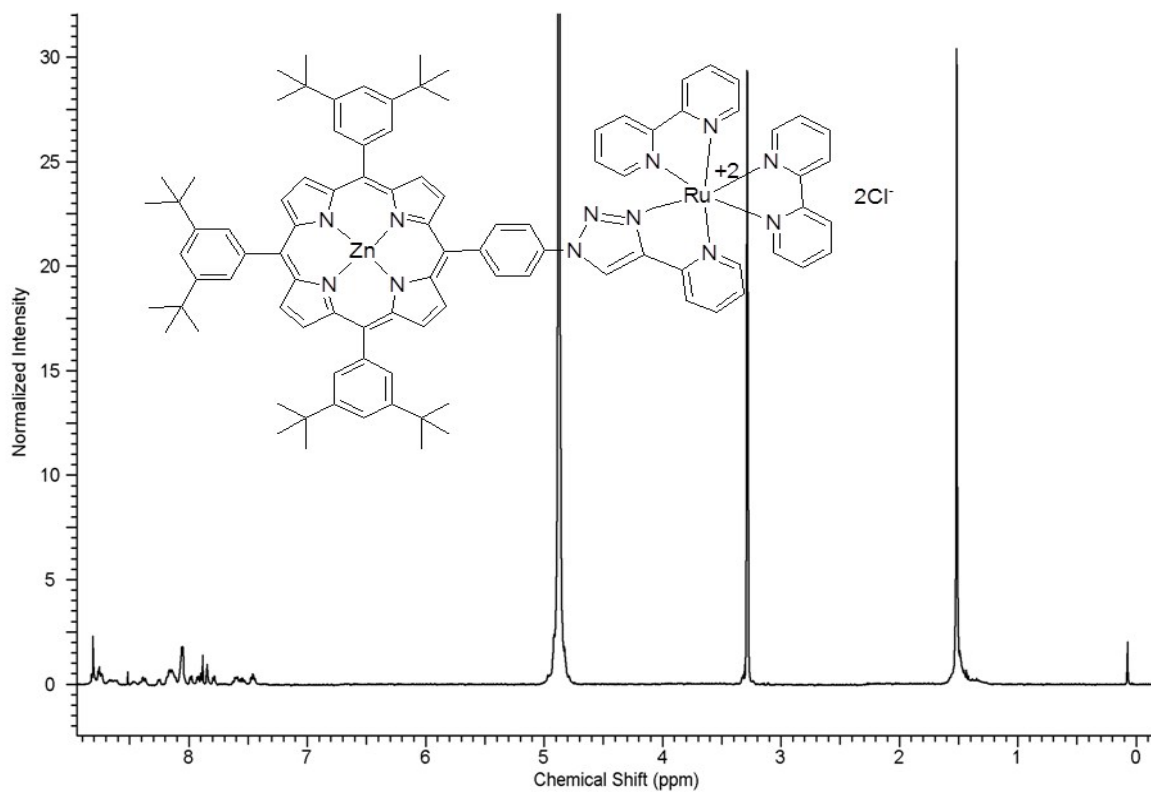

**Figure S16:**  $^1\text{H}$  NMR spectrum of 2-[5-(1-phenyl)-10,15,20-tris(3,5-di-tert-butylphenyl)porphyrinato zinc]-1H-1,2,3-triazol-4-yl-pyridine 2,2'-bispyridine ruthenium(II) chloride (8-Zn) in Methanol- $d_4$ .

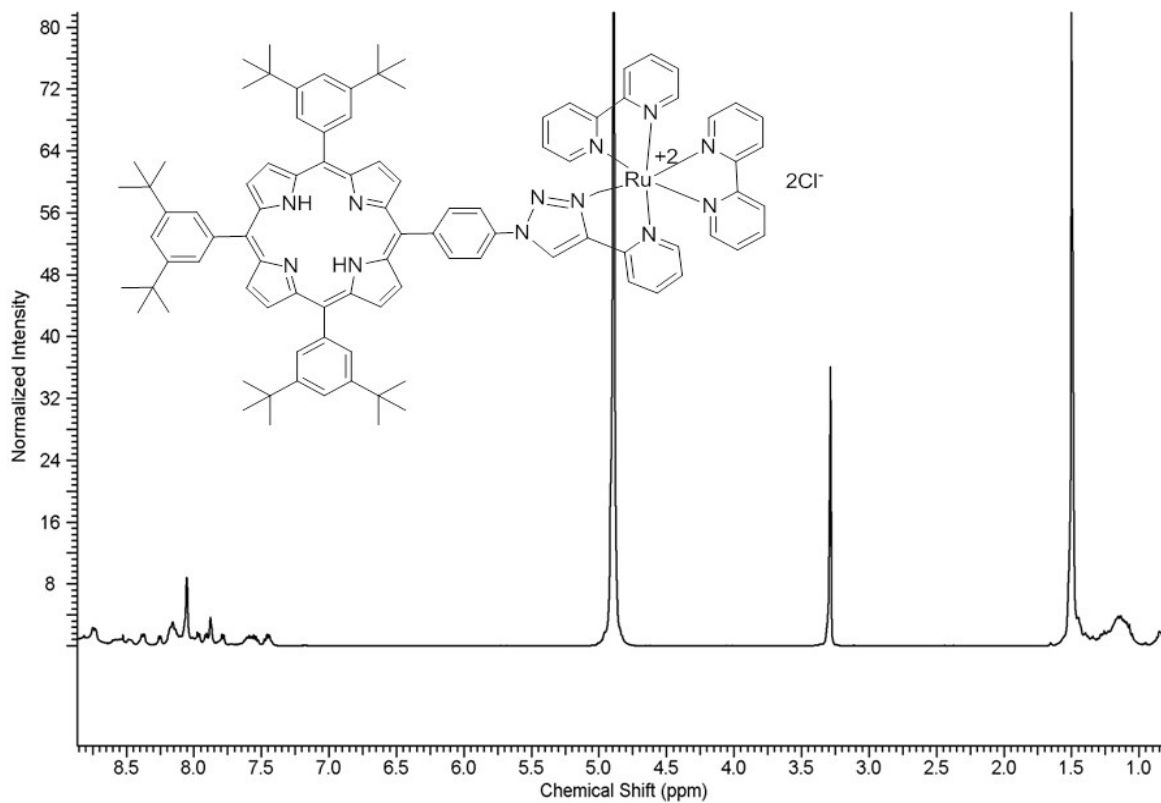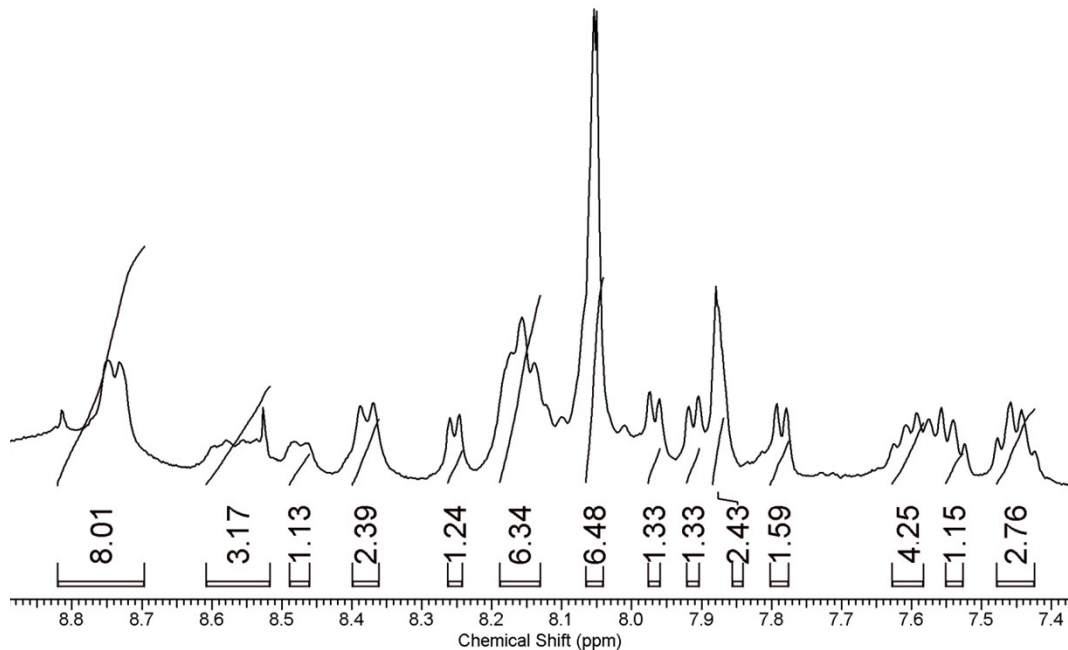

**Figure S17:**  $^1\text{H}$  NMR spectrum of 2-[5-(1-phenyl)-10,15,20-tris(3,5-di-*tert*-butyl)phenylporphyrinyl]-1*H*-1,2,3-triazol-4-yl-pyridine 2,2'-bispyridine ruthenium (II) chloride **8** in Methanol-*d*.

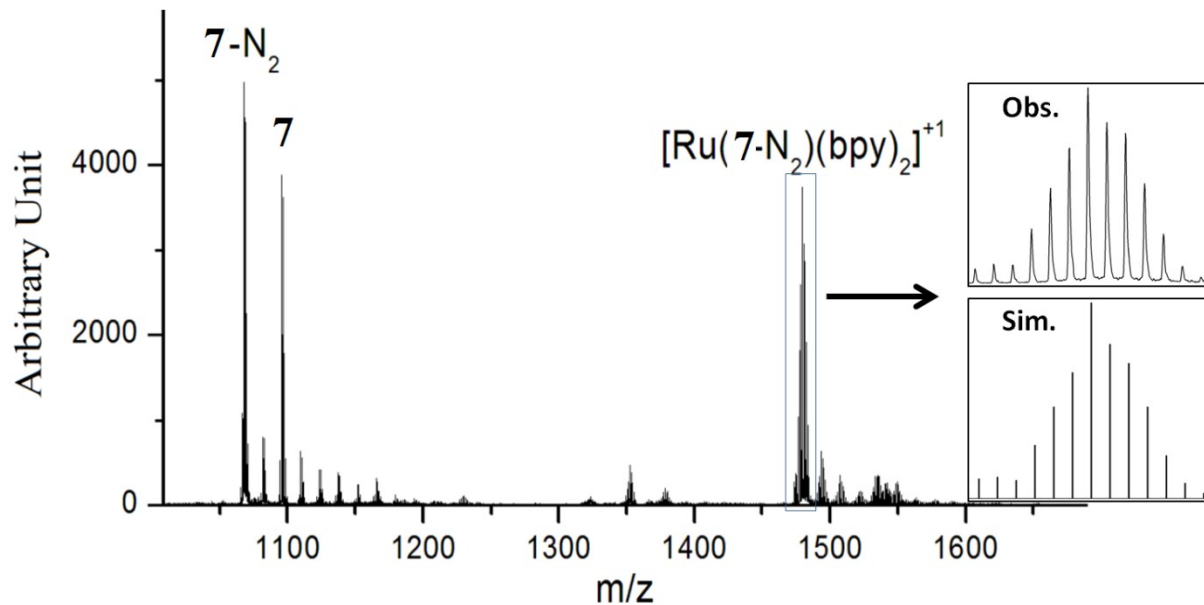

Figure S18: MALDI TOF and simulation pattern of 2-[5-(1-phenyl)-10,15,20-tris(3,5-di-tert-butyl)phenylporphyrinyl]-1H-1,2,3-triazol-4-yl-pyridine 2,2'-bispyridine ruthenium (II) chloride (8)

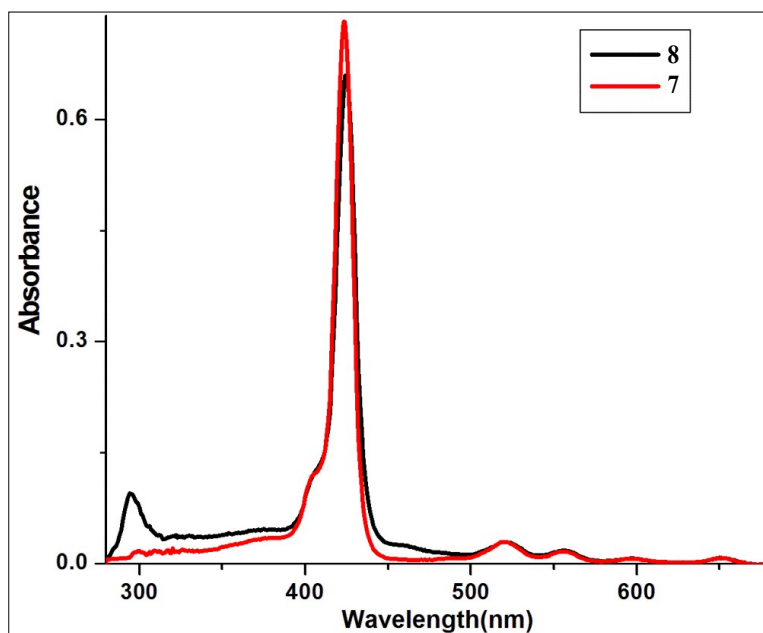

Figure S19: UV-visible spectra of 2-[5-(1-phenyl)-10,15,20-tris(3,5-di-tert-butyl)phenylporphyrinato zinc]-1,2,3-triazol-4-yl pyridine (7) and its ruthenium complex (8)

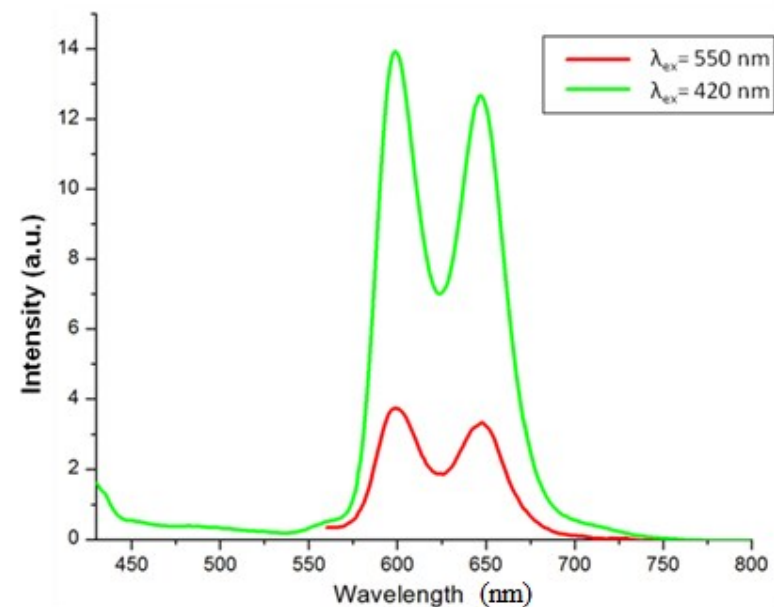

Figure S20: Steady state emission of 8-Zn with excitation of Soret band and Q band in  $\text{CHCl}_3$  ( $5 \times 10^{-6}$  M).

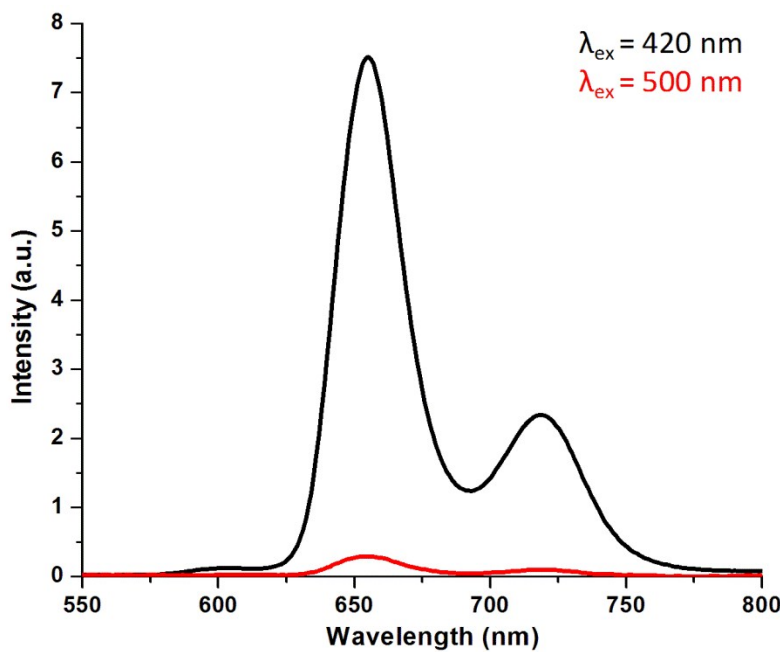

Figure S21: Steady state emission of 8 with excitation of Soret band and Q band in  $\text{CHCl}_3$  ( $1.7 \times 10^{-6}$  M).

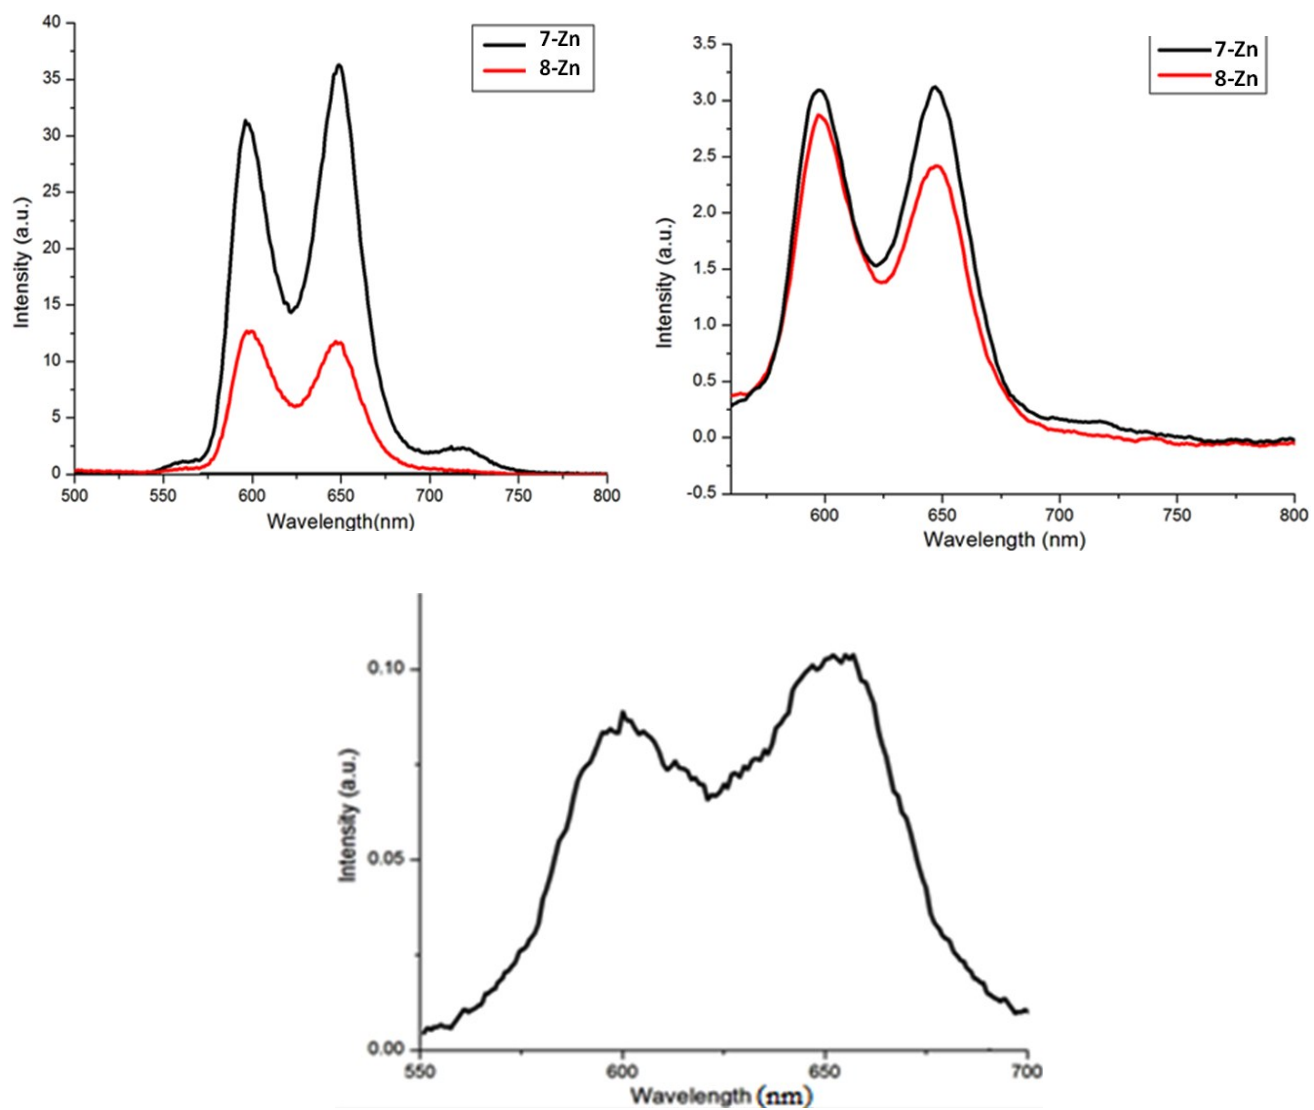

**Figure S22: Steady state emission of 8-Zn with excitation of i) Soret band, ii) Q band, iii) MLCT band in  $\text{CHCl}_3$  ( $5 \times 10^{-6}$  M)**

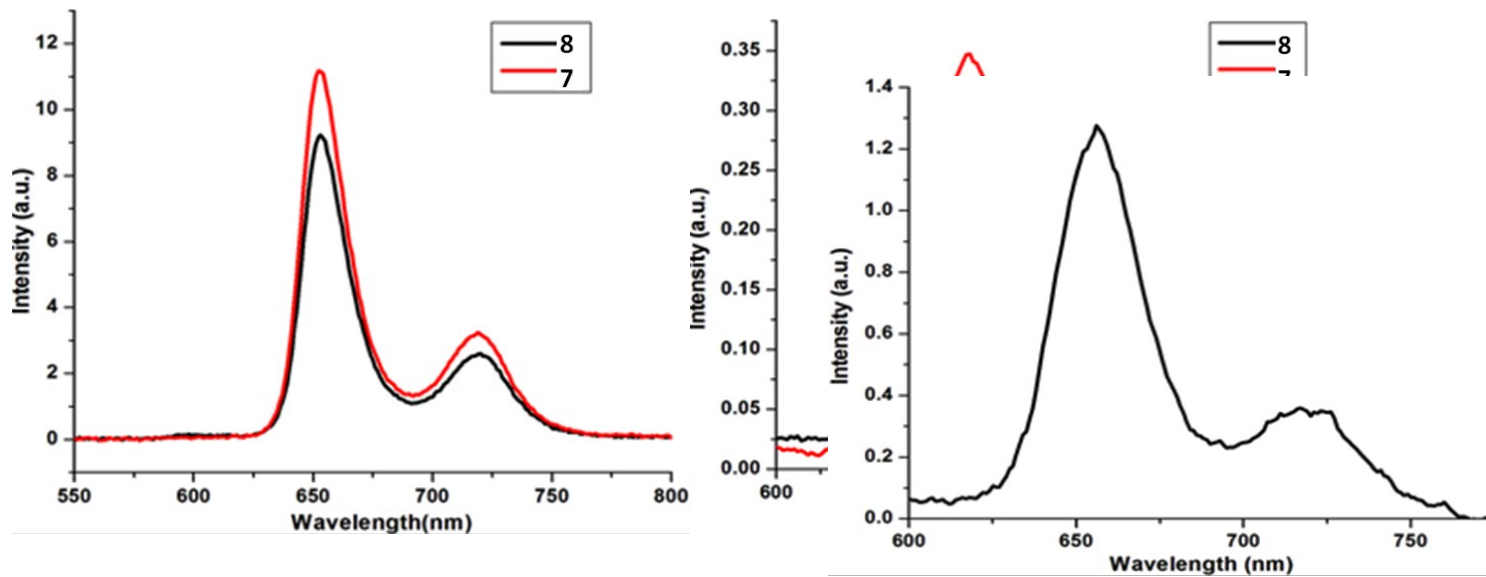

Figure S23: Steady state emission of 8 with excitation of i) Soret band, ii) Q band, iii) MLCT band in  $\text{CHCl}_3$  ( $5 \times 10^{-6}$  M)



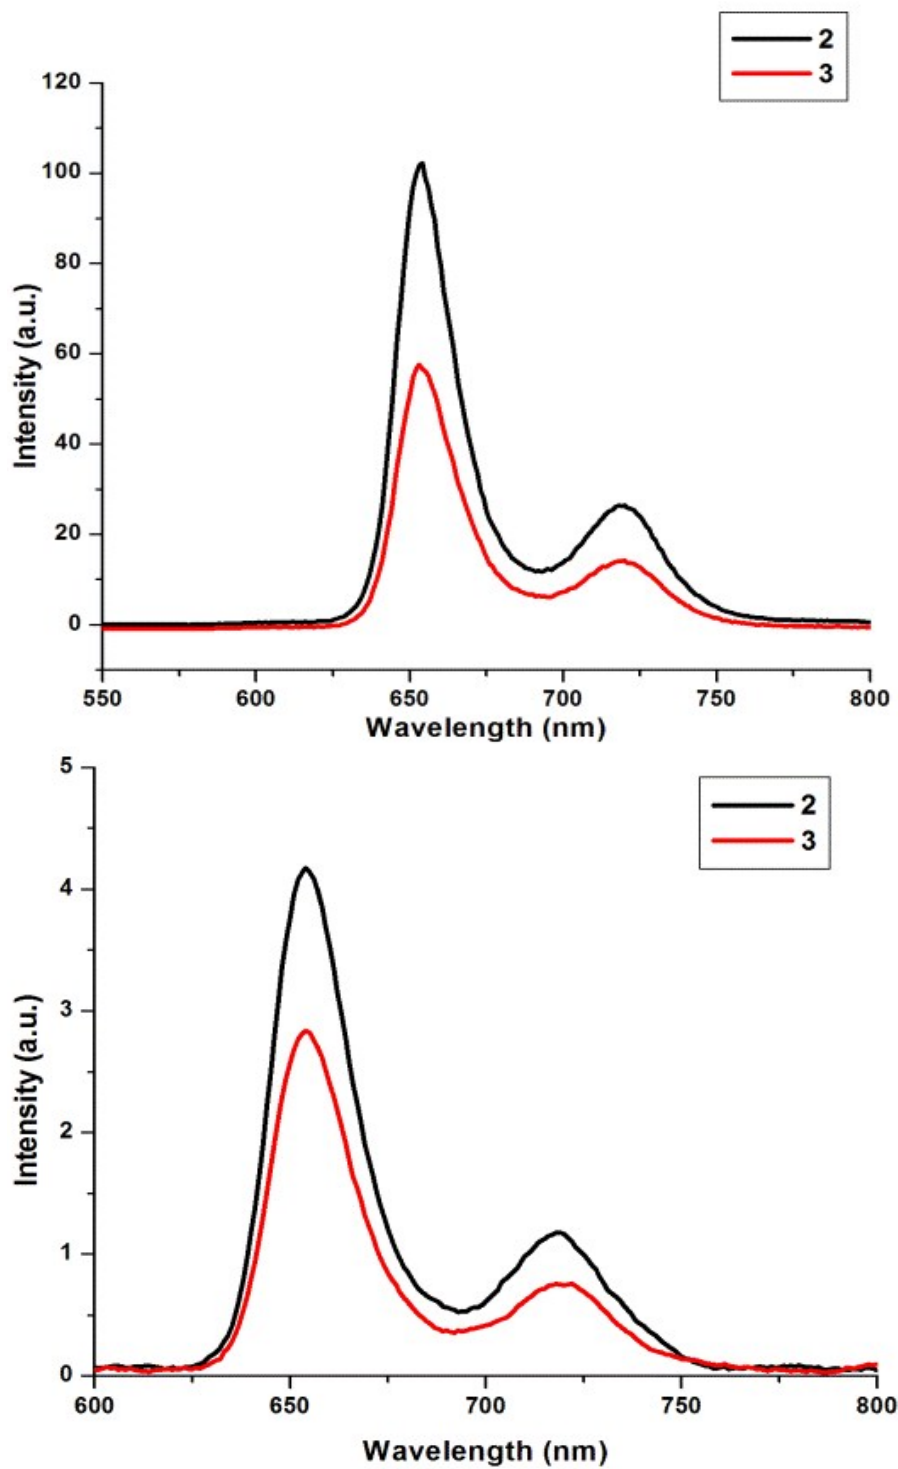

Figure S24: Steady state emission of 2, 3 with excitation of a) Soret band and b) Q band in  $\text{CHCl}_3$  ( $5 \times 10^{-6} \text{ M}$ )

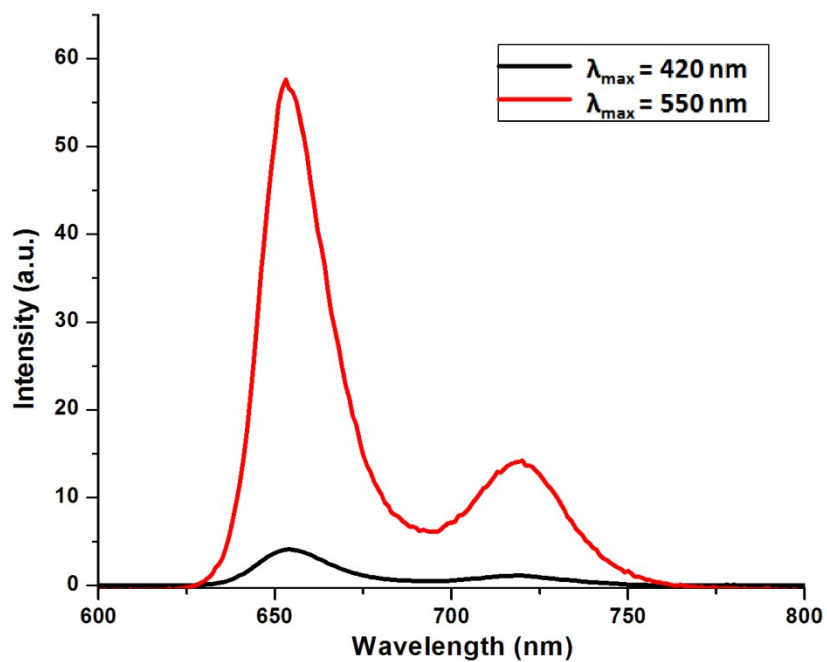

Figure S25: Steady state emission of 3 with excitation of Q band in  $\text{CHCl}_3$  ( $5 \times 10^{-6} \text{ M}$ )

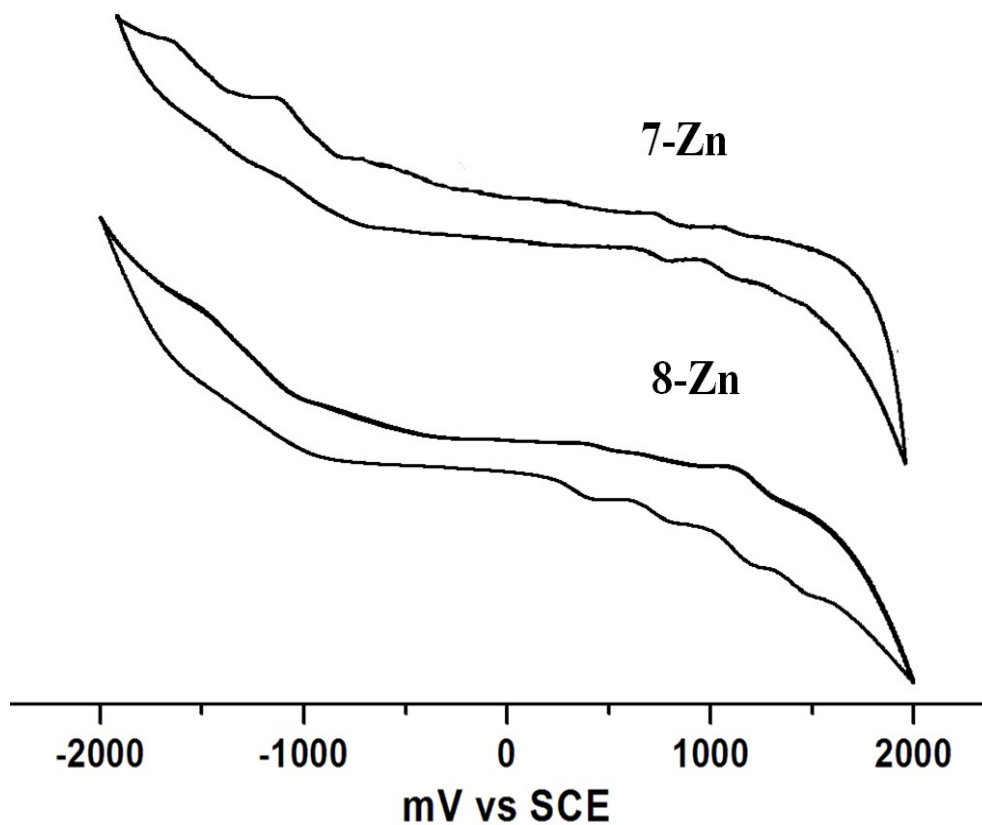

Figure S26: Cyclic voltammogram (CV) of 7-Zn, 8-Zn in  $\text{CH}_2\text{Cl}_2$  with a scan rate of 50 mV/s (0.1 M TBAPF<sub>6</sub>).

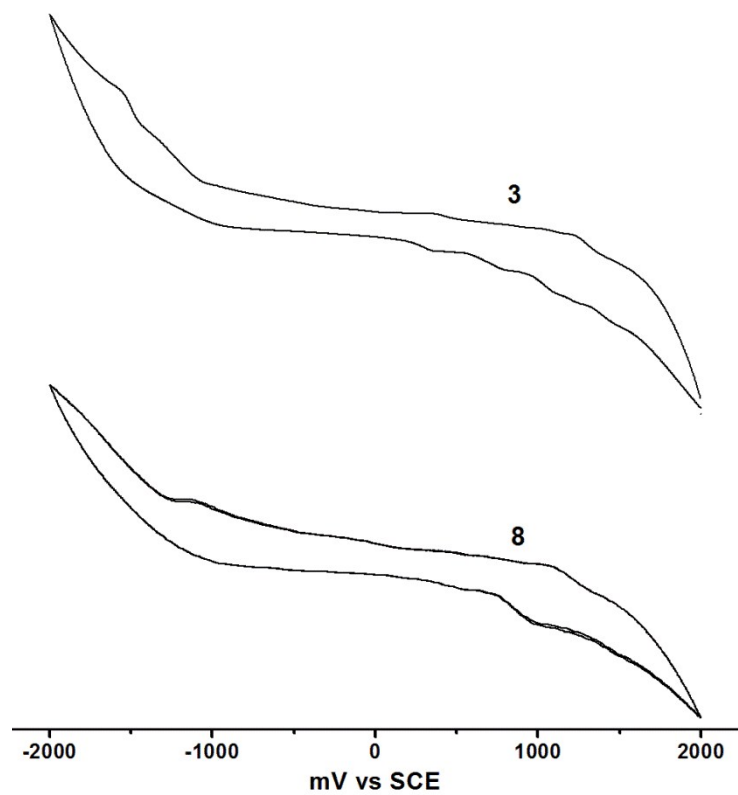

**Figure S27: Cyclic voltammogram (CV) of 8, 3 in  $\text{CH}_2\text{Cl}_2$  with a scan rate of 50 mV/s (0.1 M  $\text{TBAPF}_6$ ).**

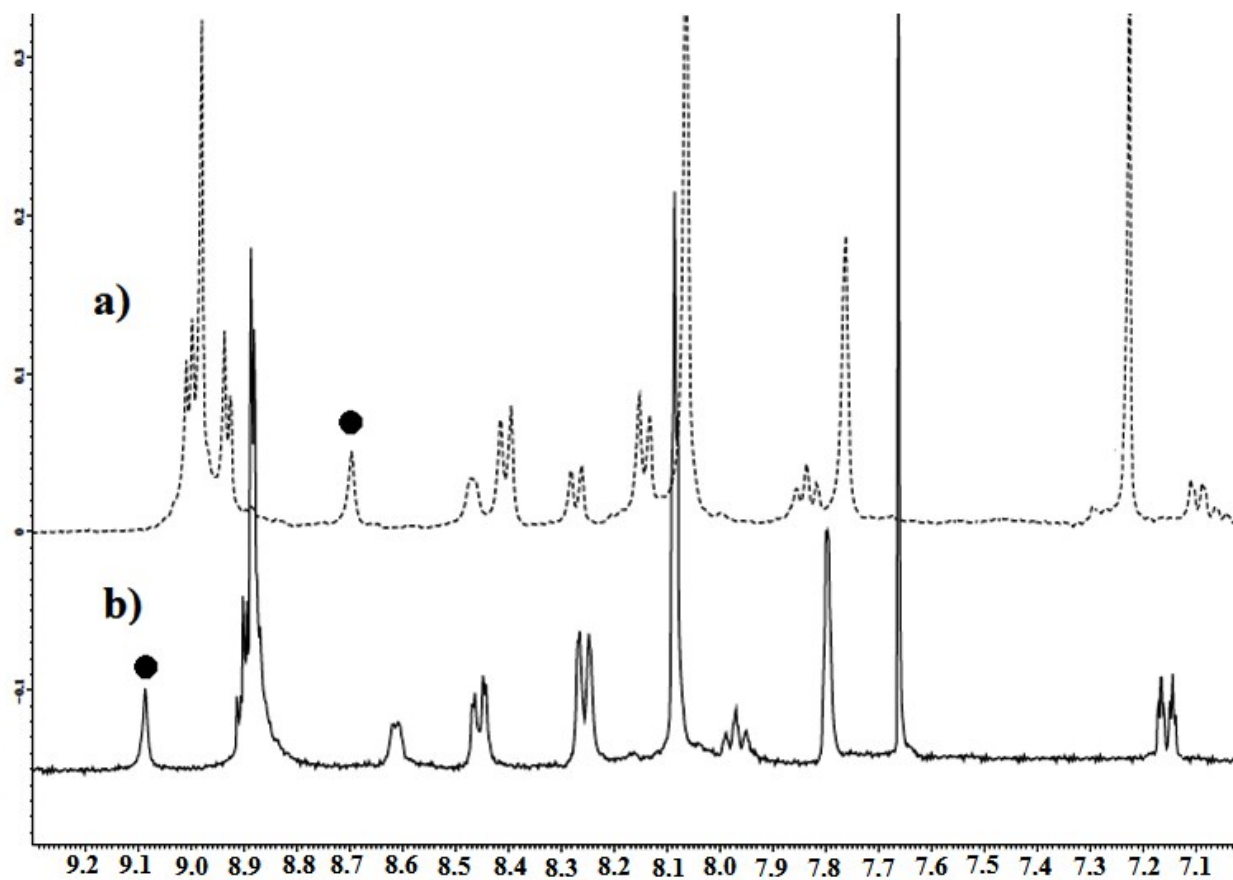

Figure S28: <sup>1</sup>H NMR spectral changes of 2-[5-(1-phenyl)-10,15,20-tris(3,5-di-tert-butylphenyl)porphyrinato zinc]-1,2,3-triazol-4-ylpyridine (7-Zn) a) in CDCl<sub>3</sub> b) in Chloroform-*d*: Methanol-*d* (1:1).

---

<sup>1</sup> Sullivan, B. P.; Salmon, D. J.; Meyer, T. J. Mixed phosphine 2,2'-bipyridine complexes of ruthenium, *Inorg. Chem.*, **1978**, *17*, 3334–3341.
